# Supplementary material for: Scalable synthesis of γ-thiolysine starting from lysine and a side by side comparison with δ-thiolysine in non-enzymatic ubiquitination
Source: Royal Society of Chemistry journal article supplement (doi:10.1039/c3sc51599k), 2013-01-01
Supplement: c3sc51599k.pdf [file c3sc51599k.pdf]

## Scalable synthesis of $\gamma$ -thiolysine starting from lysine and a side by side comparison with $\delta$ -thiolysine in non-enzymatic ubiquitination

Remco Merx,<sup>a</sup> Gerjan de Bruin,<sup>a</sup> Art Kruithof,<sup>a</sup> Toine van den Bergh,<sup>b</sup> Erwin Snip,<sup>b</sup> Martin Lutz,<sup>c</sup>  
Farid El Oualid,<sup>a</sup> Huib Ovaa\*<sup>a</sup>

<sup>a</sup> Division of Cell Biology, Netherlands Cancer Institute, Plesmanlaan 121, 1066 CX Amsterdam, The Netherlands. E-mail: h.ovaa@nki.nl.

<sup>b</sup> Mercachem B.V. Kerkenbos 1013, 6546 BB Nijmegen, The Netherlands

<sup>c</sup> Bijvoet Centre for Biomolecular Research, Crystal and Structural Chemistry, Utrecht University, Padualaan 8, 3584 CH Utrecht, the Netherlands

### SUPPORTING INFORMATION

#### General info

General reagents were obtained from Sigma Aldrich, Fluka and Acros and used as received. Solvents were purchased from BIOSOLVE. Peptide synthesis reagents were purchased from Novabiochem. Analytical thin layer chromatography was performed on aluminium sheets precoated with silica gel 60 F<sub>254</sub>, spots were visualized using 20% ninhydrin in ethanol and heating by a heatgun. Column chromatography was carried out on silica gel (0.035-0.070 mm, 90Å, Acros). Nuclear magnetic resonance spectra (<sup>1</sup>H-NMR, <sup>13</sup>C-NMR and COSY) were determined in DMSO-d<sub>6</sub> (<sup>1</sup>H  $\delta$  2.50 ppm, <sup>13</sup>C  $\delta$  39.5 ppm) or CDCl<sub>3</sub> (<sup>1</sup>H  $\delta$  7.26 ppm, <sup>13</sup>C  $\delta$  77.2 ppm) using a Bruker Avance 300 spectrometer (<sup>1</sup>H: 300 MHz, <sup>13</sup>C: 100 MHz) at 298 K. Peak shapes in NMR spectra are indicated with the symbols 'd' (doublet), 'dd' (double doublet), 's' (singlet), 't' (triplet) and 'm' (multiplet). Chemical shifts ( $\delta$ ) are given in ppm and coupling constants *J* in Hz. LC-MS measurements were performed on a system equipped with a Waters 2795 Separation Module (Alliance HT), Waters 2996 Photodiode Array Detector (190-750 nm) Phenomenex Kinetex C18 (2.1x50, 2.6  $\mu$ m) and LCT<sup>TM</sup> Orthogonal Acceleration Time of Flight Mass Spectrometer. Samples were run using 2 mobile phases: A = 1% CH<sub>3</sub>CN, 0.1% formic acid in water and B = 1% water and 0.1% formic acid in CH<sub>3</sub>CN. Data processing was performed using Waters MassLynx Mass Spectrometry Software 4.1 (deconvolution with Maxent1 function).

#### LC-MS programs

*Program 1:* Phenomenex Kinetex C18, (2.1x50 mm), 2.6  $\mu$ M; flow rate= 0.8 mL/min, runtime= 6 min, column T= 40°C. Gradient: 0 – 0.5 min: 5% B; 0.5 – 4 min: 5 → 95% B; 4 – 5.5 min: 95% B.

*Program 2:* Waters Symmetry300<sup>TM</sup> C4, 2.1x100 mm, 3.5  $\mu$ M; flow rate = 0.5 mL/min, runtime = 30 min, column T = 20°C. Gradient: 0 - 2 min: → 5%B; 2 – 3 min: → 10% B; 3 – 17 min: → 90% B; 17 – 30 min: → 95% B.

## Synthesis of suitably protected $\gamma$ -thiolysine for Fmoc SPPS

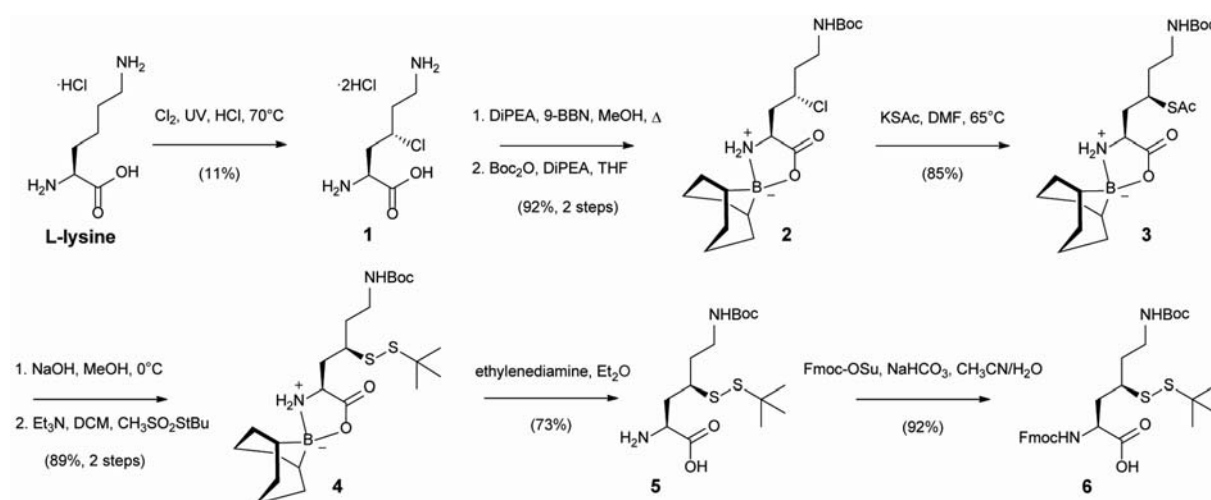

**Scheme S1** Synthesis of  $\gamma$ -thiolysine starting from lysine

## Synthesis of $\gamma$ -chloro-L-lysine dihydrochloride (**1**)

The synthesis of **1** was performed following the procedure as essentially was described by Kollonitsch *et al.*<sup>1</sup> In a photochemical reactor, a suspension of (S)-2,6-diaminohexanoic acid hydrochloride (137 g, 750 mmol) in concentrated hydrochloric acid (450 ml) was heated to 70°C to give a clear solution. Chlorine (74 g, 1044 mmol) was bubbled through the reaction mixture at a rate of about 40 g/h, while the mixture was irradiated using a medium pressure mercury lamp. After addition of the chlorine was complete, the reaction mixture was cooled to 20°C using a cryostat. The clear reaction mixture was transferred to a round bottom flask and stirred at room temperature. After 16h a precipitate formed which was isolated by filtration. The residue was washed with concentrated hydrochloric acid (10 mL), coevaporated three times from MeOH and triturated with MeOH (90 mL). The product was obtained after crystallization from concentrated HCl (200 mL) as a white solid (20.52 g, 11%); <sup>1</sup>H-NMR (300 MHz, DMSO-*d*<sub>6</sub>)  $\delta$  8.81 (br s, 3H,  $\alpha$ NH<sub>3</sub>), 8.43 (br s, 3H,  $\epsilon$ NH<sub>3</sub>), 4.48 (m, 1H,  $\gamma$ CH), 3.96 (br s,  $\alpha$ CH, 1H), 2.94 (m,  $\epsilon$ CH<sub>2</sub>, 2H), 2.31 (m, total 3H,  $\beta$ CH<sub>2</sub> +  $\delta$ CH), 2.04 (m, 1H,  $\delta$ CH); <sup>13</sup>C-NMR (75 MHz, DMSO-*d*<sub>6</sub>)  $\delta$  169.9 (C=O), 56.6 ( $\gamma$ CH), 49.6 ( $\alpha$ CH), 38.4 ( $\epsilon$ CH<sub>2</sub>), 36.1 ( $\beta$ CH<sub>2</sub>), 35.1 ( $\delta$ CH<sub>2</sub>); LC-MS (program 1): *R*<sub>t</sub> = 1.05 min, MS ES<sup>+</sup> (amu): 180.94 [M+H]<sup>+</sup>.

## Analysis of crude $\gamma$ -chloro-L-lysine dihydrochloride (**1**)

The crude reaction product was analyzed by <sup>1</sup>H-NMR and LC-MS. The major peaks in the <sup>1</sup>H NMR spectrum of the crude product (Figure S1) correspond to the <sup>1</sup>H spectrum of the final product (Figure S2). Although the crude product did contain some impurities, we were not able to find evidence for the formation of the other diastereomer in substantial amounts. The HPLC-MS spectrum of the crude product (Figure S3) predominantly showed the mass of the final product (*m/z* 180), in addition a mass which corresponded to a doubly chlorinated lysine side product was found (*m/z* 215). This presumed dichlorolysine side product was present in about 2% (calculations based on the extracted-ion chromatograms) and could be removed by crystallization from HCl.

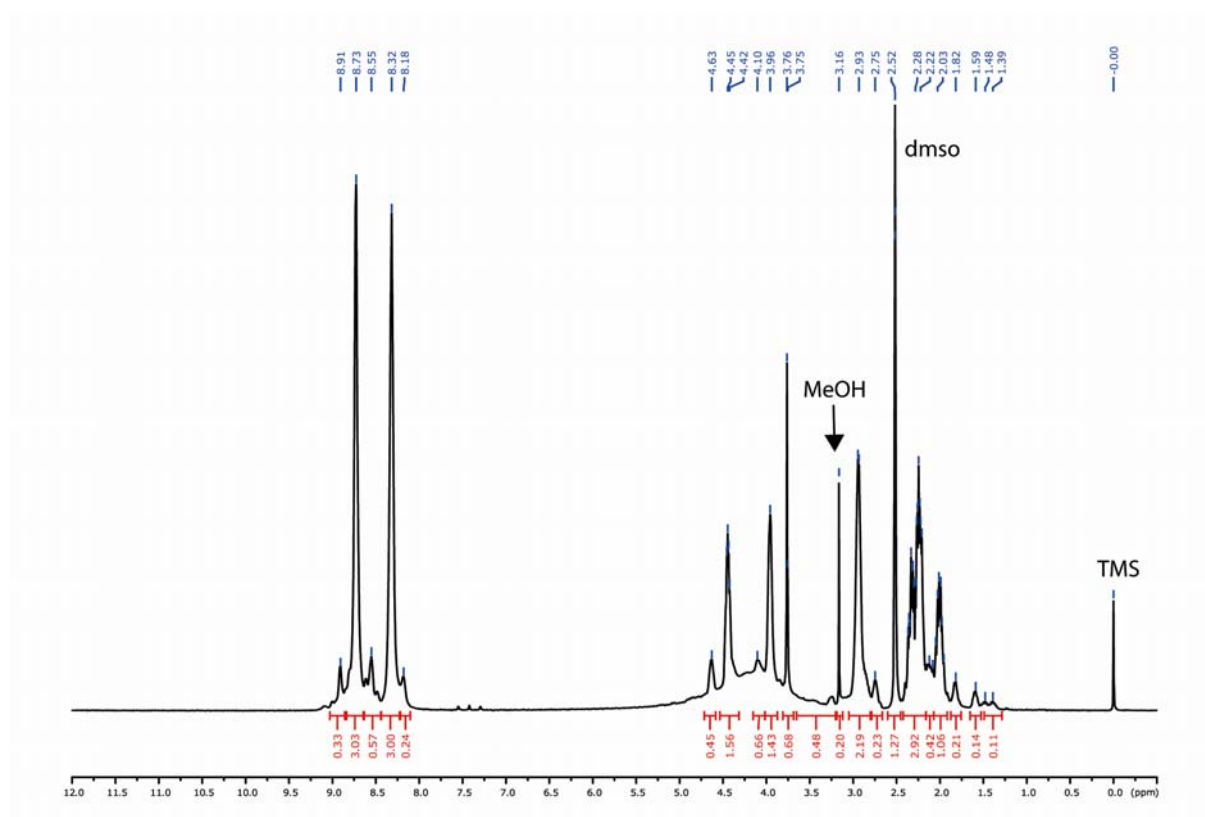

Figure S1 <sup>1</sup>H-NMR spectrum of the crude reaction product (DMSO-d<sub>6</sub>).

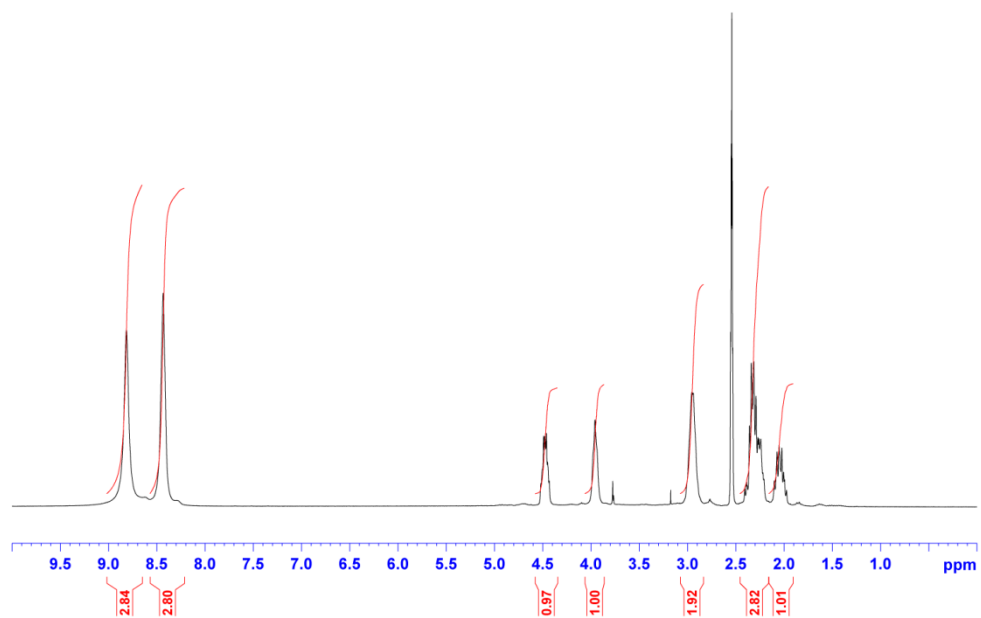

Figure S2 <sup>1</sup>H-NMR spectrum of the purified final product (DMSO-d<sub>6</sub>).

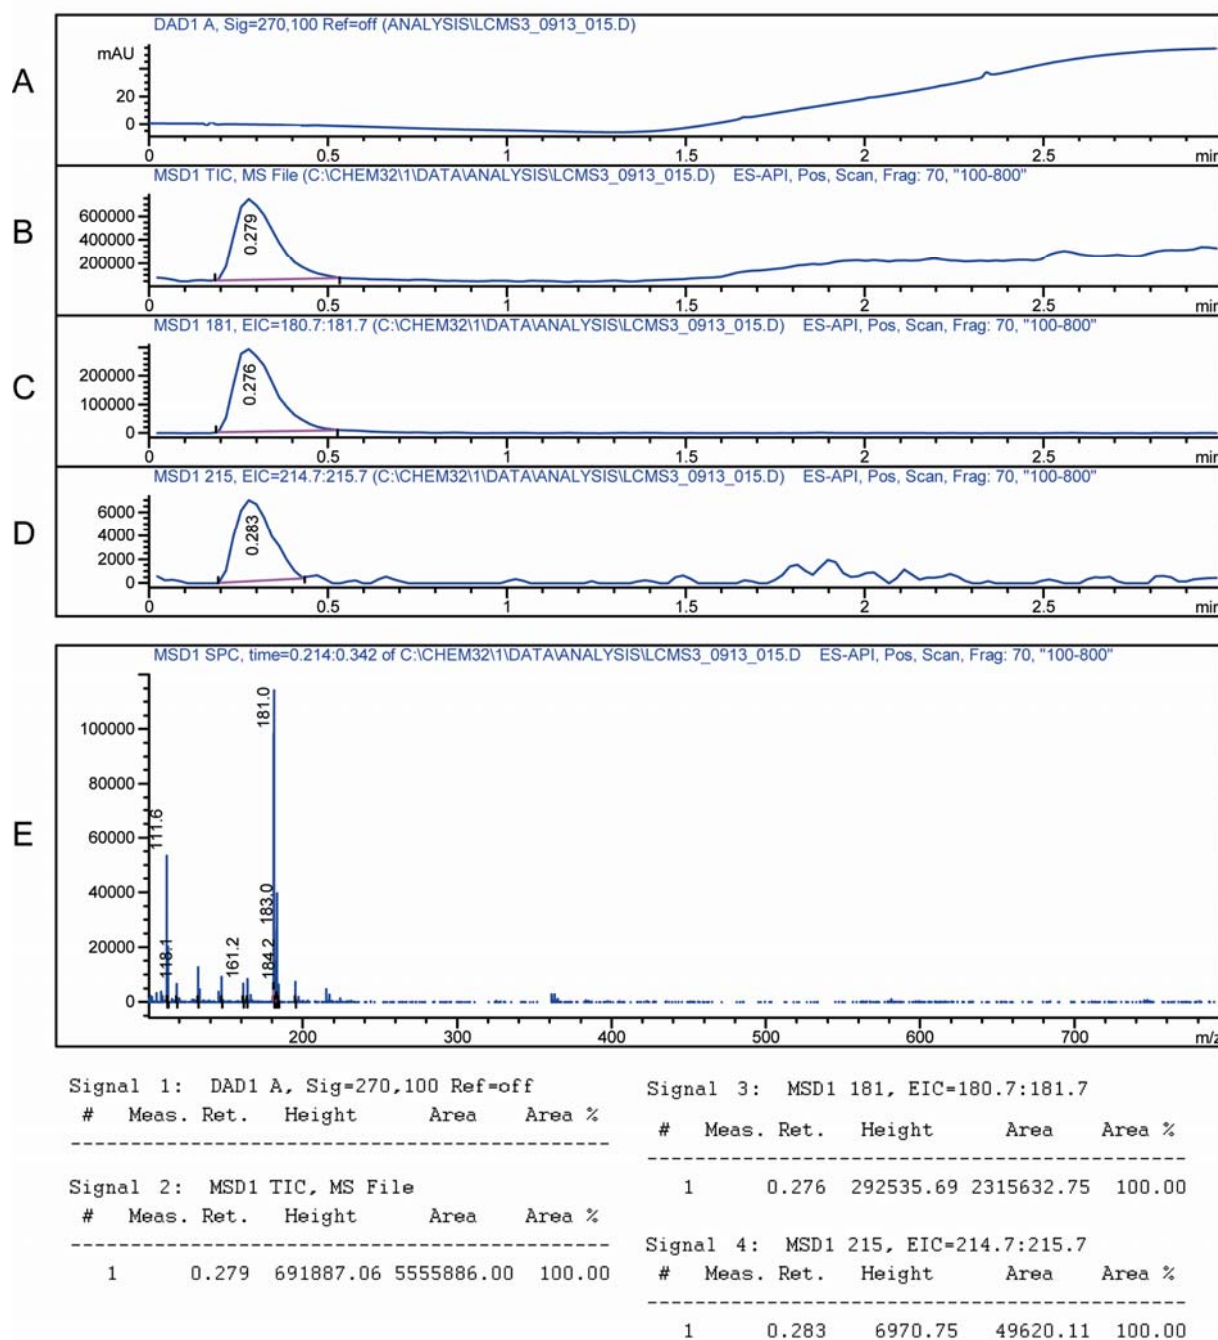

**Figure S3** HPLC-MS analysis of the crude reaction product. A) UV trace, B) Total ion chromatogram, C) Extracted-ion chromatogram ( $m/z$  181), D) Extracted-ion chromatogram ( $m/z$  215), E) Mass spectrum. Conditions; Column: Waters XSelect (C18, 30x2.1mm, 3.5 $\mu$ ), Flow: 1 ml/min Column temp: 35°C, Eluent A: 0.1% Formic acid in acetonitrile, Eluent B: 0.1% Formic acid in water, Lin. Gradient: t=0 min 2% A, t=1.6 min 98% A, t=3 min 98%A, Detection: DAD (220 - 320 nm), Detection: MSD (ESI pos/neg) mass range: 100 – 800.

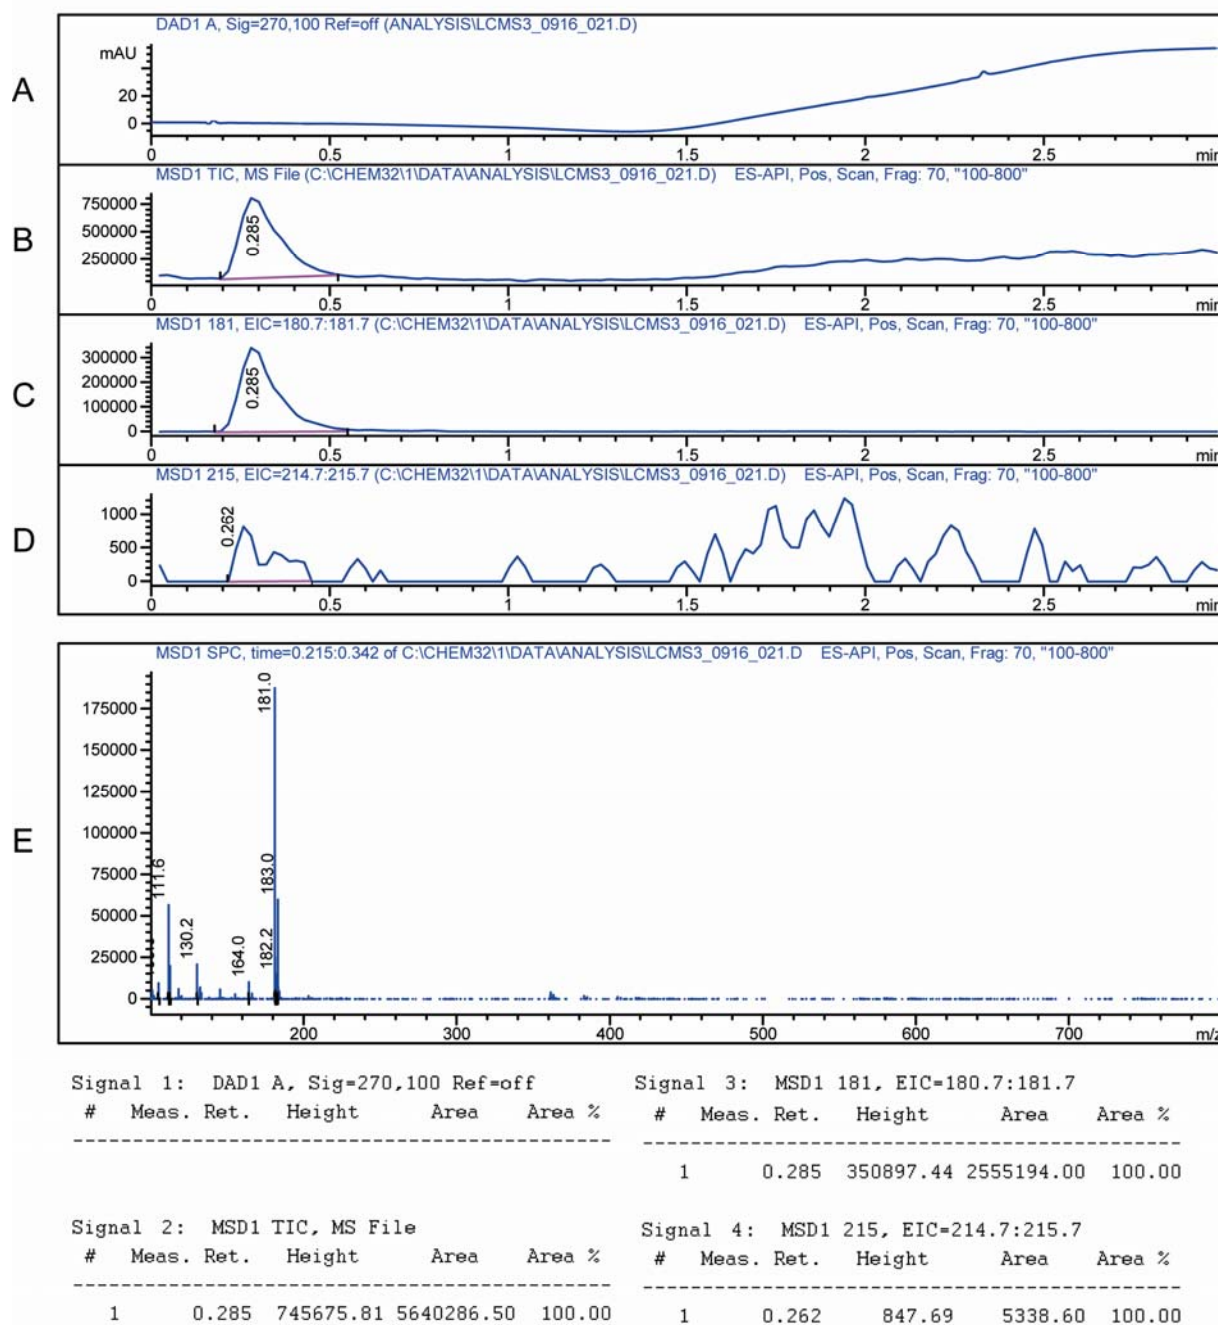

**Figure S4** HPLC-MS analysis of the purified final product. A) UV trace, B) Total ion chromatogram, C) Extracted-ion chromatogram ( $m/z$  181), D) Extracted-ion chromatogram ( $m/z$  215), E) Mass spectrum. Conditions; Column: Waters XSelect (C18, 30x2.1mm, 3.5 $\mu$ ), Flow: 1 ml/min Column temp: 35°C, Eluent A: 0.1% Formic acid in acetonitrile, Eluent B: 0.1% Formic acid in water, Lin. Gradient:  $t=0$  min 2% A,  $t=1.6$  min 98% A,  $t=3$  min 98%A, Detection: DAD (220 - 320 nm), Detection: MSD (ESI pos/neg) mass range: 100 – 800.

### Synthesis of *N*<sup>ε</sup>-*tert*-butoxycarbonyl-L-lysinato-bicyclononylboron (**2**).

DiPEA (1.75 mL, 10.0 mmol) was added to a stirred solution of **1** (1.27 g, 5.0 mmol) in dry MeOH (25 mL). After 5 minutes the reaction mixture turned turbid and 9-BBN (1.40 g, 5.75 mmol) was added. The suspension was heated at 70°C under nitrogen for 2 h until the reaction mixture turned clear and LC-MS analysis confirmed complete conversion to the borane protected product (program 2: *R*<sub>t</sub> = 6.73 min, MS ES<sup>+</sup> (amu): 301.0 [M+H]<sup>+</sup>). The solvent was removed *in vacuo* and the residue was coevaporated with DCM (twice). The residue was dissolved in dry THF (25 mL) and DiPEA (1.75 mL, 10.0 mmol) and Boc<sub>2</sub>O (1.09 g, 5.0 mmol) were added. The reaction mixture was stirred for 3 h before 1N KHSO<sub>4</sub> (25 mL) was added. The THF was removed *in vacuo*, and the remaining aqueous phase was extracted with EtOAc. The organic phase was washed with 1N KHSO<sub>4</sub> and brine, dried (Na<sub>2</sub>SO<sub>4</sub>) and concentrated. The product was isolated as a white foam (1.84 g, 92%) by flash column chromatography (eluent: 1:4 → 1:2 EtOAc:hexane (v/v)).

On a 187.7 mmol scale, 59.3 g (79%) of product was obtained.

*R*<sub>f</sub> = 0.25 (eluent: 1:1 EtOAc:hexane (v/v)); <sup>1</sup>H-NMR (300 MHz, CDCl<sub>3</sub>) δ 5.64 (m, 1H, αNH), 5.07 – 4.87 (m, total 2H, αNH + εNH), 4.31 (m, 1H, γCH), 3.88 (m, 1H, αCH), 3.21 (m, 2H, εCH<sub>2</sub>), 2.55 – 2.43 (m, 1H, βCH), 2.19 – 1.29 (m, total 15H, βCH + δCH<sub>2</sub> + 6×CH<sub>2</sub> borane), 1.37 (s, 9H, 3×CH<sub>3</sub> tBu), 0.54 (br s, 2H, 2×CH borane); <sup>13</sup>C-NMR (75 MHz, CDCl<sub>3</sub>) δ 173.9 (αC=O), 156.3 (C=O Boc), 79.8 (Cq tBu), 58.9 (γCH), 53.8 (αCH), 39.5 (βCH<sub>2</sub>), 38.5 (δCH<sub>2</sub>), 37.7 (εCH<sub>2</sub>), 31.8 (CH<sub>2</sub> borane), 31.5 (CH<sub>2</sub> borane), 31.2 (CH<sub>2</sub> borane), 31.1 (CH<sub>2</sub> borane), 28.4 (3×CH<sub>3</sub> tBu), 24.4 (CH<sub>2</sub> borane), 24.1 (CH borane), 23.8 (CH<sub>2</sub> borane), 22.6 (CH borane). LC-MS (program 2): *R*<sub>t</sub> = 10.74 min, MS ES<sup>+</sup> (amu): 401.0 [M+H]<sup>+</sup>.

### Synthesis of *N*<sup>ε</sup>-*tert*-butoxycarbonyl-4-(*S*-acetyl)-L-lysinato-bicyclononylboron (**3**).

KSAc (122 mg, 1.07 mmol) was added to a solution of **2** (244 mg, 0.61 mmol) in DMF (10 mL). The reaction mixture was stirred for 3 h at 65°C before the solvent was removed *in vacuo*. The residue was redissolved in EtOAc, washed with brine, dried (Na<sub>2</sub>SO<sub>4</sub>) and concentrated. The product (229 mg, 85%) was isolated as a white foam by flash column chromatography (eluent: 1:4→1:2 EtOAc:hexane (v/v)).

On a 147.9 mmol scale, 47.1 g (72%) of product was obtained.

*R*<sub>f</sub> = 0.17 (1:1 EtOAc/hexane v/v); <sup>1</sup>H-NMR (300 MHz, CDCl<sub>3</sub>) δ 5.42 – 5.17 (m, 2H, αNH<sub>2</sub>), 5.04 (br s, 1H, εNH), 3.68 – 3.47 (m, total 2H, αCH + γCH), 3.35 (m, 1H, εCH), 3.15 – 3.01 (m, 1H, εCH), 2.47 – 2.30 (m, 1H, βCH), 2.38 (s, 3H, CH<sub>3</sub> SAc), 2.21 – 1.36 (m, total 15H, βCH + δCH<sub>2</sub> + 6×CH<sub>2</sub> borane), 1.44 (s, 9H, 3×CH<sub>3</sub> tBu), 0.64 (br s, 1H, CH borane), 0.51 (br s, 1H, CH, borane); <sup>13</sup>C-NMR (75 MHz, CDCl<sub>3</sub>) δ 199.2 (C=O, SAc), 173.5 (αC=O), 157.3 (C=O, Boc), 80.04 (Cq, Boc), 53.6 (αCH), 38.4 (γCH), 37.7 (εCH<sub>2</sub>), 37.1 (δCH<sub>2</sub>), 36.2 (βCH<sub>2</sub>), 32.0 (CH<sub>2</sub> borane), 31.4 (CH<sub>2</sub> borane), 31.3 (CH<sub>2</sub> borane), 31.0 (CH<sub>2</sub> borane), 30.7 (CH<sub>3</sub> SAc), 28.3 (3×CH<sub>3</sub> tBu), 24.5 (CH<sub>2</sub>, borane), 24.0 (CH, borane), 23.9 (CH<sub>2</sub>, borane), 22.5 (CH, borane). LC-MS (program 2): *R*<sub>t</sub> = 11.14 min, MS ES<sup>+</sup> (amu): 441.0 [M+H]<sup>+</sup>.

#### Synthesis of *N*<sup>ε</sup>-*tert*-butoxycarbonyl-4-(*tert*-butyldisulfanyl)-L-lysinate-bicyclononylboron (**4**).

1N NaOH (1.36 mL) was added to a cooled (0°C) solution of thioacetate **3** (487 mg, 1.11 mmol) in methanol (12 mL) the resulting mixture was stirred under nitrogen at 0°C. After 30 min the reaction mixture was neutralized by the addition of equimolar amounts of AcOH and concentrated. The residue was redissolved in ethyl acetate and washed with 1N KHSO<sub>4</sub> and brine, dried (Na<sub>2</sub>SO<sub>4</sub>), and concentrated to afford the crude thiol as a white foam. In a separate flask, a mixture of *S*-*tert*-butyl methanesulfonylthioate (558 mg, 3.3 mmol) and Et<sub>3</sub>N (1.39 μL, 9.9 mmol) in degassed DCM (5 mL) was stirred under nitrogen at room temperature before a solution of the crude thiol in degassed DCM (5 mL) was added dropwise over a period of 30 min. The reaction mixture was stirred for an additional hour and concentrated. The residue was redissolved in ethyl acetate and washed with 1N KHSO<sub>4</sub> and brine, dried (Na<sub>2</sub>SO<sub>4</sub>), and concentrated. The product was isolated by flash column chromatography (eluent: DCM→EtOAc/DCM 1:4 v/v) as a white foam (481 mg, 89%).

On a 106.9 mmol scale, 25.3 g (48%) of product was obtained. In the large scale procedure crude *S*-*tert*-butyl methanesulfonylthioate was used without isolation from the reaction mixture after its synthesis from mesylchloride and 2-methyl-2-propanethiol in the presence of Et<sub>3</sub>N in DCM.

<sup>1</sup>H-NMR (300 MHz, CDCl<sub>3</sub>) δ 5.40 (m, 1H, αNH), 5.16 (m, 1H, αNH), 5.03 (m, 1H, εNH), 4.17 – 3.99 (m, 1H, αCH), 6.54 (m, 1H, εCH), 3.18 – 2.99 (m, 1H, εCH), 2.90 (m, 1H, γCH), 2.24 (m, 2H, βCH<sub>2</sub>), 2.07 – 1.27 (m, total 14H, δCH<sub>2</sub> + 6×CH<sub>2</sub> borane), 1.39 (s, 9H, 3×CH<sub>3</sub> tBu Boc), 1.32 (s, 9H, 3×CH<sub>3</sub> SStBu), 0.62 (s, total 2H, 2×CH<sub>2</sub> borane); <sup>13</sup>C-NMR (75 MHz, CDCl<sub>3</sub>) δ 173.7 (αC=O), 157.0 (C=O Boc), 79.9 (Cq tBu Boc), 53.5 (αCH), 48.5 (γCH), 48.4 (Cq SStBu), 37.9 (εCH<sub>2</sub>), 36.9 (δCH<sub>2</sub>), 35.8 (βCH<sub>2</sub>), 32.2 (CH<sub>2</sub> borane), 31.3 (CH<sub>2</sub> borane), 31.2 (CH<sub>2</sub> borane), 30.9 (CH<sub>2</sub> borane), 29.9 (3×CH<sub>3</sub> SStBu), 28.3 (3×CH<sub>3</sub> tBu Boc), 24.3 (CH<sub>2</sub> borane), 24.0 (CH borane), 23.8 (CH<sub>2</sub> borane), 22.5 (CH borane). LC-MS (program 2): R<sub>t</sub> = 12.58 min, MS ES+ (amu): 487.0 [M+H]<sup>+</sup>.

#### Synthesis of *N*<sup>ε</sup>-*tert*-butoxycarbonyl-4-(*tert*-butyldisulfanyl)-L-lysine (**5**).

Ethylenediamine (1050 μL, 15.4 mmol) was added to a solution of **4** (500 mg, 1.02 mmol) in ether (15 mL). The resulting mixture was stirred for 4 hours and concentrated *in vacuo*. The product (280 mg, 73%) was isolated by flash column chromatography (SiO<sub>2</sub>, eluent: 9:1 → 6:4 DCM/MeOH v/v) as a white solid.

On a 52.0 mmol scale, 16.5 g (87%) of product was obtained. In addition, 4.4 g of the borane starting material could be retrieved which was converted to 2.4 g (72%) of **5** in a separate reaction.

<sup>1</sup>H-NMR (300 MHz, CDCl<sub>3</sub>) δ 3.73 (t, *J* = 6.9, 1H, αCH), 3.28-3.22 (m, 2H, εCH<sub>2</sub>), 3.09 – 3.01 (m, 1H, γCH), 2.39 – 2.29 (m, 1H, βCH), 2.00 – 1.85 (m, total 3H, βCH + δCH<sub>2</sub>), 1.45 (s, 9H, 3×CH<sub>3</sub> SStBu), 1.35 (s, 9H, 3×CH<sub>3</sub> tBu Boc); <sup>13</sup>C-NMR (75 MHz, CDCl<sub>3</sub>) δ 174.0 (αC=O), 158.7 (C=O Boc), 80.3 (Cq Boc), 54.2 (γCH), 47.9 (αCH), 38.9 (εCH<sub>2</sub>), 37.9 (δCH<sub>2</sub>), 35.3 (βCH<sub>2</sub>), 30.8 (3×CH<sub>3</sub> SStBu), 28.9 (3×CH<sub>3</sub> tBu Boc). LC-MS (program 2): R<sub>t</sub> = 7.41 min, MS ES+ (amu): 366.9 [M+H]<sup>+</sup>.

### Synthesis of *N*<sup>α</sup>-(fluoren-9-ylmethoxycarbonyl)-*N*<sup>ε</sup>-*tert*-butoxycarbonyl-4-(*tert*-butyldisulfanyl)-L-lysine (**6**).

A solution of Fmoc-OSu (320 mg, 0.95 mmol) in MeCN (5 mL) was added to a solution of **5** (280 mg, 0.76 mmol) and NaHCO<sub>3</sub> (128 mg, 1.52 mmol) in 1:1 H<sub>2</sub>O/MeCN (50 mL). After stirring for 3 hours, the organic layer was evaporated and 0.5 N KHSO<sub>4</sub> (50 mL) was added. The resulting suspension was extracted with EtOAc (3x50 mL) and the organic layer was dried (Na<sub>2</sub>SO<sub>4</sub>) and concentrated. The product (**6**, 414 mg 92%) was isolated as a white foam by column chromatography (eluent: 2→5% MeOH in DCM).

On a 45.0 mmol scale, 14.3 g (54%) of product was obtained. In addition, on a 45.0 mmol scale, 3.0 g (78%) of product was obtained. Thus in total 17.3 gram of pure **6** could be obtained starting from 47.6 g of **2**.

*R*<sub>f</sub>=0.25 (5% MeOH in DCM). <sup>1</sup>H-NMR (300 MHz, CDCl<sub>3</sub>) δ 8.78 (br s, 1H, COOH), 7.74 – 7.29 (m, total 8H Hz, Fmoc), 6.45 – 6.31 (br s, 1H, αNH), 4.92 (m, 1H, εNH), 4.71 (m, 1H, αCH), 4.43 – 4.17 (m, 3H, CH + CH<sub>2</sub> Fmoc), 3.30 – 3.27 (m, 2H, εCH<sub>2</sub>), 2.98 (m, 1H, γCH), 2.27 – 1.72 (m, 3H, βCH<sub>2</sub> + δCH), 1.75 (1H, δCH), 1.43 (br s, 9H, SStBu), 1.30 (s, 9H, tBu Boc); <sup>13</sup>C-NMR (75 MHz, CDCl<sub>3</sub>) δ 174.0 (αC=O), 158.7 (C=O Boc), 80.3 (Cq Boc), 54.2 (γCH), 47.9 (αCH), 38.9 (εCH<sub>2</sub>), 37.9 (δCH<sub>2</sub>), 35.3 (βCH<sub>2</sub>), 30.8 (3xCH<sub>3</sub> SStBu), 28.9 (3xCH<sub>3</sub> tBu Boc).

### Synthesis of *N*<sup>α</sup>,*N*<sup>ε</sup>-*bis-tert*-butoxycarbonyl-4-(*tert*-butyldisulfanyl)-L-lysine (**7**).

Chlorolysine **2** (4 g, 15.78 mmol, 1 eq.) was slowly added to a cooled solution (0 °C) of thionyl chloride (11.46 mL, 157.8 mmol, 10 eq.) in MeOH (200 mL). The resulting reaction mixture was refluxed at 75 °C for 4h until LC-MS analysis indicated complete conversion to the methyl ester. The reaction mixture was allowed to cool down to r.t. and the reaction mixture was concentrated *in vacuo*. The crude methyl ester (**2**) was used without further purification. ESMS Calcd for C<sub>7</sub>H<sub>15</sub>N<sub>2</sub>O<sub>2</sub>Cl [M+H]<sup>+</sup>, 195.09, found 195.00. *R*<sub>t</sub> = 0.45 min. Crude **2** (15.76 mmol, 1 eq.) was suspended in 140 mL MeCN and Et<sub>3</sub>N (8.8 mL, 63.04 mmol, 4 eq.) was added. Next, a solution of Boc<sub>2</sub>O (12 g, 55.16 mmol, 3.5 eq.) in MeCN (20 mL) was added. The resulting reaction mixture was stirred at r.t. for 18h. The reaction mixture was concentrated to dryness and the residue was taken up in EtOAc. The organic layer was washed with 1M KHSO<sub>4</sub> (3x) and NaHCO<sub>3</sub> (sat.) (3x). The organic layer was dried over Na<sub>2</sub>SO<sub>4</sub>, filtered and concentrated. The product was isolated by flash column chromatography (SiO<sub>2</sub>, eluent: 1:3 → 1:2 EtOAc/hexane) to give **3** (6.09 g, 15.42 mmol, 98%) as a colorless oil. *R*<sub>f</sub> = 0.64 (EtOAc/hexane 1:2). <sup>1</sup>H-NMR (300 MHz, CDCl<sub>3</sub>) δ 5.29 (br s, 1H, NH), 4.82 (br s, 1H, NH), 4.43 (m, 1H, αCH), 4.03 (m, 1H, γCH), 3.30 (m, 2H, εCH<sub>2</sub>), 2.34 – 2.03 (m, total 3H, βCH<sub>2</sub> + δCH), 1.44 (s, tBu Boc, 9H), 1.42 (s, tBu Boc, 9H); <sup>13</sup>C-NMR (75 MHz, CDCl<sub>3</sub>) δ 172.2 (C=O), 156.0 (C=O), 155.4 (C=O), 80.3 (Cq Boc), 79.2 (Cq Boc), 56.3 (γCH), 52.6 (OCH<sub>3</sub>), 51.3 (αCH), 41.6 (βCH<sub>2</sub>), 37.8 (double line δCH<sub>2</sub> + εCH<sub>2</sub>), 28.4 (3xCH<sub>3</sub> tBu Boc), 28.3 (3xCH<sub>3</sub> tBu Boc); LC-MS (program 2): *R*<sub>t</sub> = 3.57 min, MS ES+ (amu):417.0 [M+H]<sup>+</sup>.

A small portion of **7** was crystallized from DCM/hexanes for X-ray crystal structure determination.

### X-ray crystal structure determination of *N<sup>α</sup>,N<sup>ε</sup>-bis-tert-butoxycarbonyl-4-(tert-butylidisulfanyl)-L-lysine (7)*

$C_{17}H_{31}ClN_2O_6$ , Fw = 394.89, colourless needle,  $0.50 \times 0.03 \times 0.03$  mm<sup>3</sup>, trigonal,  $P3_1$  (no. 144),  $a = b = 32.591(3)$ ,  $c = 5.1877(5)$  Å,  $V = 4772.1(9)$  Å<sup>3</sup>,  $Z = 9$ ,  $D_x = 1.237$  g/cm<sup>3</sup>,  $\mu = 1.88$  mm<sup>-1</sup>. 2995 Reflections were measured on a Bruker Proteum diffractometer with rotating anode ( $\lambda = 1.54184$  Å) at a temperature of 100(2) K up to a resolution of  $(\sin \theta/\lambda)_{\max} = 0.57$  Å<sup>-1</sup>. Intensity data were integrated with the Saint software.<sup>2</sup> Absorption correction and scaling was performed with SADABS<sup>3</sup> (correction range 0.59–0.75). 9698 Reflections were unique ( $R_{\text{int}} = 0.062$ ), of which 8880 were observed [ $I > 2\sigma(I)$ ]. The structure was solved with the program SHELXT.<sup>4</sup> Least-squares refinement was performed with SHELXL-2013<sup>5</sup> against  $F^2$  of all reflections. Non-hydrogen atoms were refined freely with anisotropic displacement parameters. All hydrogen atoms were located in difference Fourier maps and refined with a riding model. 725 Parameters were refined with one restraint (floating origin).  $R1/wR2$  [ $I > 2\sigma(I)$ ]: 0.0438 / 0.1168.  $R1/wR2$  [all refl.]: 0.0506 / 0.1211.  $S = 1.117$ . Flack parameter<sup>6</sup>  $x = -0.006(15)$ . Residual electron density between  $-0.28$  and  $0.35$  e/Å<sup>3</sup>. Geometry calculations and checking for higher symmetry was performed with the PLATON program.<sup>7</sup>

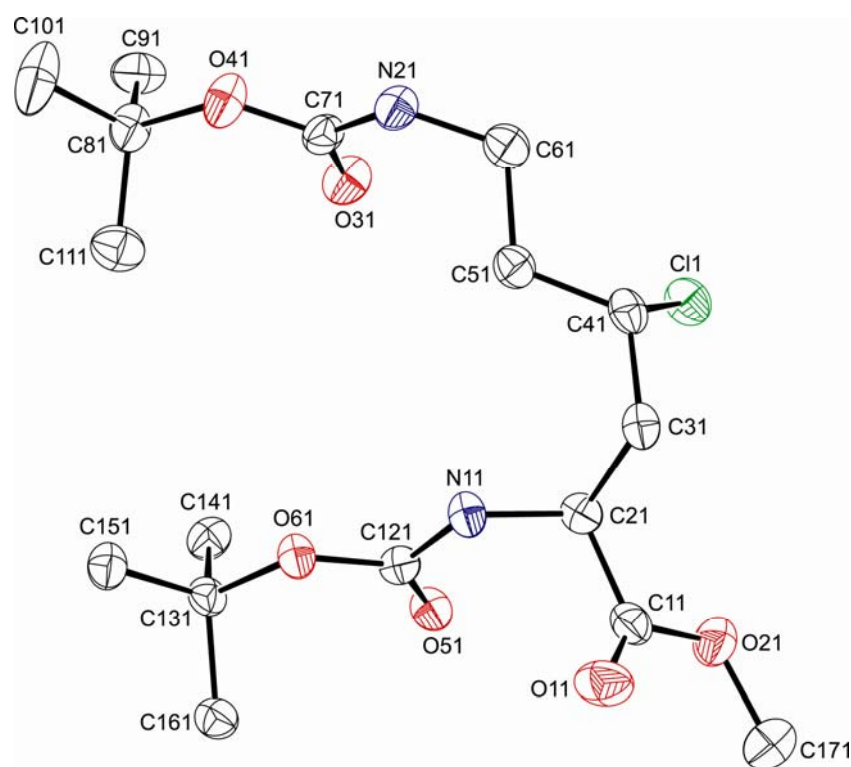

**Figure S5** ORTEP representation of the structure of *bis-Boc* protected  $\gamma$ -chlorolysine methylester (**7**), drawn at the 50% probability level. Only one of three independent molecules is shown. Hydrogen atoms are omitted for clarity.

## Synthesis ubiquitin $\delta/\gamma$ -thiolysine mutants

### General Fmoc SPPS Strategy

SPPS was performed on a Syro II MultiSyntech Automated Peptide synthesizer using standard 9-fluorenylmethoxycarbonyl (Fmoc) based solid phase peptide chemistry at 25  $\mu$ mol scale, using fourfold excess of amino acids relative to pre-loaded Fmoc amino acid Wang type resin (0.2 mmol/g, Applied Biosystems®) or pre-loaded Fmoc amino acid trityl resin (0.2 mmol/g, Rapp Polymere GmbH). The Ub (mutant) peptide sequences were synthesized on resin following the procedures as described before.<sup>8</sup>

### Purification of ubiquitin thiolysine mutants.

The crude Ub thiolysine mutant was taken up in a minimal amount of warm DMSO and diluted with 50 mM NaOAc pH 4.5 while the final DMSO concentration was kept as low as possible (2 – 10%). Next, the peptide was purified by cation chromatography using a MonoS column and a 0  $\rightarrow$  1 M NaCl gradient in 50 mM NaOAc pH 4.5. Fractions that contained the were pooled and further purified by prep-HPLC using 2 mobile phases: A=0.05% TFA in MQ and B: 0.05% TFA in CH<sub>3</sub>CN. Prep-HPLC program: Waters C18-Symmetry 80 Å (10x250 mm); flowrate: 7.5 mL/min. Gradient: 0 – 5 min: 5% B; 5 – 8 min: 5  $\rightarrow$  25% B; 8 – 30 min: 25  $\rightarrow$  60% B; 30 – 33 min: 60  $\rightarrow$  95% B. Pure fractions were pooled and lyophilized.

**Ub(K48 $\delta$ -thiolysine):** LC-MS (program 1):  $R_t$  = 2.35, ES MS+ (amu) calcd: 8643, found 8642

**Ub(K48 $\gamma$ -thiolysine):** LC-MS (program 1):  $R_t$  = 2.32, ES MS+ (amu) calcd: 8685, found 8690

**Ub(K33 $\delta$ -thiolysine):** LC-MS (program 1):  $R_t$  = 2.50, ES MS+ (amu) calcd: 8643, found 8646

**Ub(K33 $\gamma$ -thiolysine):** LC-MS (program 1):  $R_t$  = 2.57, ES MS+ (amu)calcd 8685, found 8687

### Synthesis of K48 $\delta$ /γ-thiolysine linked diUbs

In a sealed reaction vessel under a nitrogen atmosphere, a solution of the K48Ub  $\delta$ /γ-thiolysine mutant (0.9 mg, 0.58 mM) in 0.2 M sodium phosphate buffer (pH 7) containing 6M Gdn·HCl was incubated with TCEP (150 mM) at 37°C for 40 minutes. Next, a solution of UbMESNa thioester (1.25 equiv) in 0.2 M sodium phosphate buffer (pH 7) containing 6M Gdn·HCl and MPAA (100 mM) was added and the mixture was incubated at 37°C. After 6 hours, an additional portion of UbMESNa (1 equiv) was added and the reaction mixture was further incubated at 37°C over night. After a total reaction time of 24 hours, the reaction mixture was spun down to remove the precipitate that had formed and most of the small molecules (MPAA, TCEP) were removed from the supernatant by a buffer exchange for 0.2 M sodium phosphate buffer (pH 7) containing 6M Gdn·HCl over a 3 kDa cutoff spin-column (Amicon® Ultra). The obtained mixture was purified by prep-HPLC using 2 mobile phases: A=0.05% TFA in MQ and B: 0.05% TFA in CH<sub>3</sub>CN. Prep-HPLC program: Phenomenex Jupiter 5u C18 300 Å (50x4.6 mm); flowrate: 1 mL/min. Gradient: 0 – 5 min: 5% B; 5 – 8 min: 5 → 25% B; 8 – 30 min: 25 → 45% B; 30 – 33 min: 45 → 95% B.

**K48 $\delta$ -thiolysine linked Ub<sub>2</sub>:** 0.92 mg (53%), LC-MS (program 1): R<sub>t</sub> = 2.45, ES MS<sup>+</sup> (amu) calcd 17143, found 17142

**K48γ-thiolysine linked Ub<sub>2</sub>:** 0.90 mg (48%), LC-MS (program 1): R<sub>t</sub> = 2.45, ES MS<sup>+</sup> (amu) calcd 17143, found 17143

### Synthesis of K33 $\delta$ /γ-thiolysine linked diUbs

In a sealed reaction vessel under a nitrogen atmosphere, a solution of the K33Ub  $\delta$ /γ-thiolysine mutant (2 mg, 0.58 mM) in 0.2 M sodium phosphate buffer (pH 7) containing 6M Gdn·HCl was incubated with TCEP (150 mM) at 37°C for 40 minutes. Next, a solution of UbMESNa thioester (1.25 equiv) in 0.2 M sodium phosphate buffer (pH 7) containing 6M Gdn·HCl and MPAA (100 mM) was added and the mixture was incubated at 37°C. After 3 hours, an additional portion of UbMESNa (1 equiv) was added and the reaction mixture was further incubated at 37°C over night followed by the addition of another portion of UbMESNa (0.5 equiv). After a total reaction time of 24 hours, the reaction mixture was spun down to remove the precipitate that had formed and most of the small molecules (MPAA, TCEP) were removed from the supernatant by a buffer exchange for 0.2 M sodium phosphate buffer (pH 7) containing 6M Gdn·HCl over a 3 kDa cutoff spin-column (Amicon® Ultra). The obtained mixture was purified by prep-HPLC using 2 mobile phases: A=0.05% TFA in MQ and B: 0.05% TFA in CH<sub>3</sub>CN. Prep-HPLC program: Phenomenex Jupiter 5u C18 300 Å (50x4.6 mm); flowrate: 1 mL/min. Gradient: 0 – 5 min: 5% B; 5 – 8 min: 5 → 25% B; 8 – 30 min: 25 → 45% B; 30 – 33 min: 45 → 95% B.

**K33 $\delta$ -thiolysine linked Ub<sub>2</sub>:** LC-MS (program 1): R<sub>t</sub> = 2.60, ES MS<sup>+</sup> (amu) calcd 17143, found 17141

**K33γ-thiolysine linked Ub<sub>2</sub>:** LC-MS (program 1): R<sub>t</sub> = 2.60, ES MS<sup>+</sup> (amu) calcd 17143, found 17148

# SDS-PAGE analysis of Ub ligation reactions

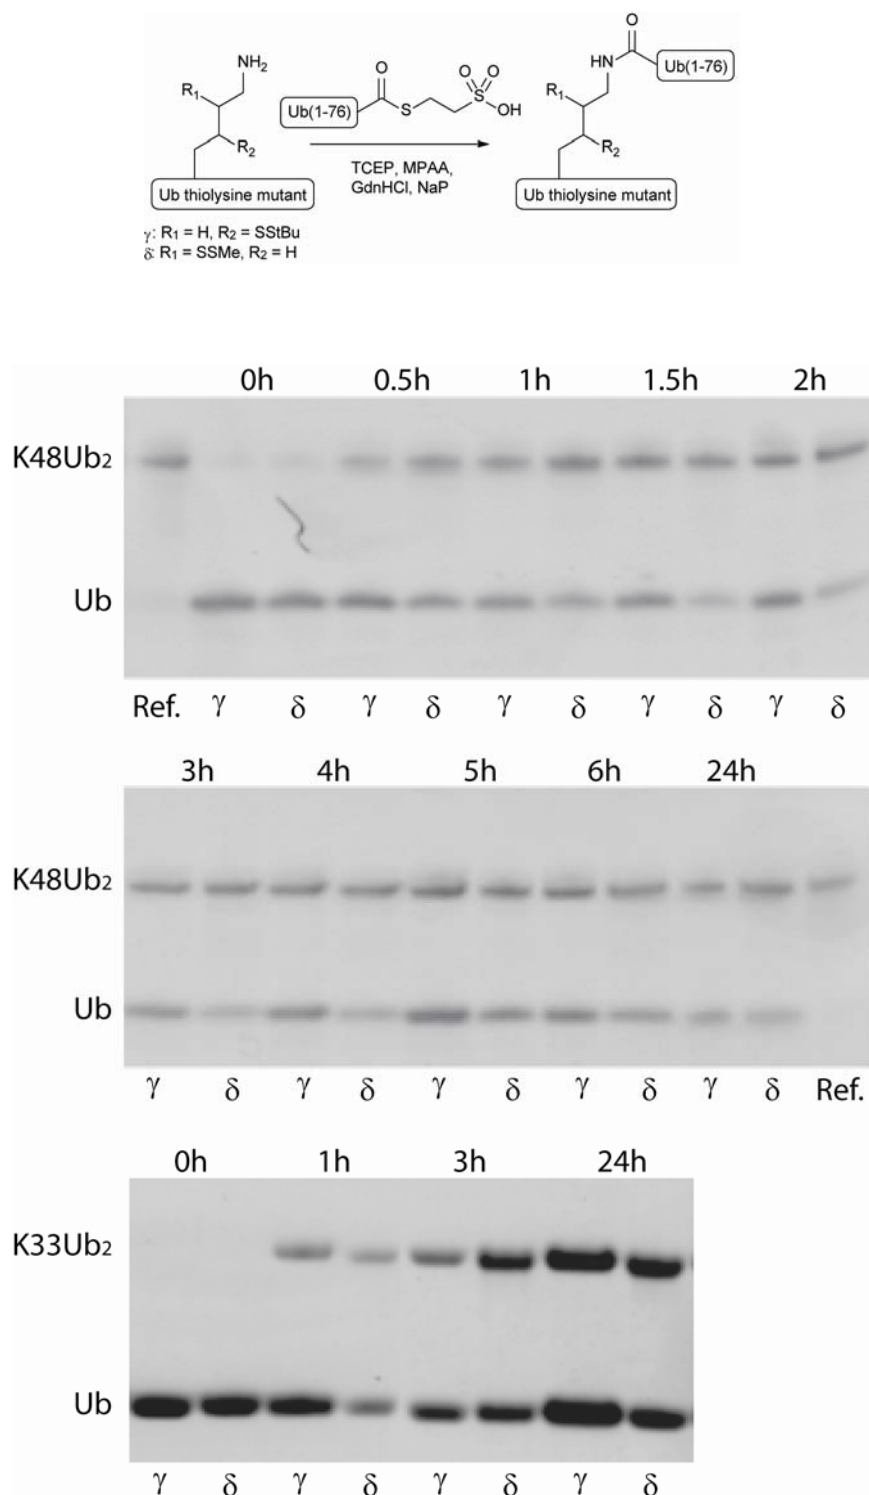

**Figure S6** Gel analysis of the Ub ligation reactions (SDS PAGE gel 12%, MES buffer).

## Quantification of gel bands

The gel band ratios between Ub2 and Ub were quantified at different time-points after background correction using the ImageJ (NHI, ver. 1.47) software package.

|        |       |       |       |       |       |       |       |       |       |       |
|--------|-------|-------|-------|-------|-------|-------|-------|-------|-------|-------|
| T (h)  | 0     | 0     | 0.5   | 0.5   | 1     | 1     | 1.5   | 1.5   | 2     | 2     |
|        | gamma | delta |
| k48Ub2 | 1599  | 2081  | 6970  | 15932 | 14110 | 18542 | 16792 | 16294 | 15470 | 18697 |
| Ub     | 18375 | 17231 | 16332 | 15730 | 18009 | 12377 | 16001 | 9217  | 16214 | 9371  |
| T (h)  | 3     | 3     | 4     | 4     | 5     | 5     | 6     | 6     | 24    | 24    |
|        | gamma | delta |
| k48Ub2 | 16729 | 17958 | 18324 | 17405 | 18766 | 17345 | 17654 | 19106 | 21329 | 21843 |
| Ub     | 15532 | 9740  | 17374 | 9348  | 18817 | 15491 | 16051 | 15268 | 15337 | 12529 |
| T (h)  | 0     | 0     | 1     | 1     | 3     | 3     | 24    | 24    |       |       |
|        | gamma | delta | gamma | delta | gamma | delta | gamma | delta |       |       |
| k33Ub2 | 478   | 165   | 6700  | 8424  | 10622 | 18767 | 24194 | 21816 |       |       |
| Ub     | 24954 | 23217 | 21552 | 17987 | 18989 | 19698 | 29396 | 22758 |       |       |

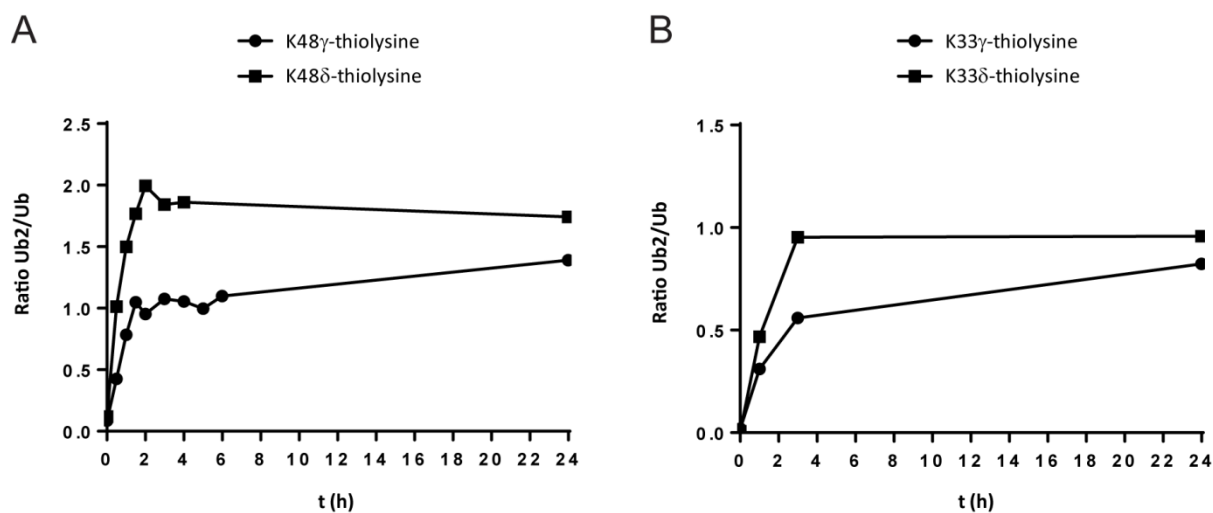

**Figure S7** Plot of gel bands ratios between Ub2 and Ub for K48δ/γ-thiolysine (A)\* and K33δ/γ-thiolysine (B) mediated ligations at different time-points.

\*Data points at 5h and 6h were outliers and are therefore omitted from the graph.

### Desulfurization of K48 $\delta$ /γ-thiolysine modified diUbs

To a solution of the diUb conjugate (0.9 mg) in 900  $\mu$ L degassed 0.2 M sodium phosphate buffer (pH 6.5) containing 6M Gdn-HCl, GSH (40 mM) and TCEP (200 mM), was added VA-044 (final conc 40 mM). The mixture was incubated under Ar at 37°C. In most cases desulfurizations were complete within 4 h, incomplete reactions were treated with fresh portions of VA-044 and GSH to ensure full conversion to the desulfurized product. The mixtures were purified by prep-HPLC using 2 mobile phases: mobile phases: A=0.05% TFA in MQ water and B: 0.05% TFA in CH<sub>3</sub>CN. Phenomenex Jupiter 5u C18 300 Å (50x4.6 mm); flowrate: 1 mL/min. Gradient: 0 – 5 min: 5% B; 5 – 8 min: 5  $\rightarrow$  25% B; 8 – 30 min: 25  $\rightarrow$  45% B; 30 – 33 min: 45  $\rightarrow$  95% B.

**K48 linked Ub<sub>2</sub> synthesized via  $\delta$ -thiolysine:** 0.30 mg (30%), LC-MS (program 1): R<sub>t</sub> = 2.50, ES MS+ (amu) calcd 17112, found 17110

**K48 linked Ub<sub>2</sub> synthesized via  $\gamma$ -thiolysine:** 0.30 mg (30%), LC-MS (program 1): R<sub>t</sub> = 2.48, ES MS+ (amu) calcd 17112, found 17110

### Desulfurization of K33 $\delta$ /γ-thiolysine modified diUbs

To a solution of the diUb conjugate in 2 mL degassed 0.2 M sodium phosphate buffer (pH 6.5) containing 6M Gdn-HCl, GSH (40 mM) and TCEP (200 mM), was added VA-044 (final conc 40 mM). The mixture was incubated under Ar at 37°C. In most cases desulfurizations were complete within 4 h, incomplete reactions were treated with fresh portions of VA-044 and GSH to ensure full conversion to the desulfurized product. The mixtures were purified by prep-HPLC using 2 mobile phases: mobile phases: A=0.05% TFA in MQ water and B: 0.05% TFA in CH<sub>3</sub>CN. Phenomenex Jupiter 5u C18 300 Å (50x4.6 mm); flowrate: 1 mL/min. Gradient: 0 – 5 min: 5% B; 5 – 8 min: 5  $\rightarrow$  25% B; 8 – 30 min: 25  $\rightarrow$  45% B; 30 – 33 min: 45  $\rightarrow$  95% B.

**K33 linked Ub<sub>2</sub> synthesized via  $\delta$ -thiolysine:** 1.4 mg (35%, 2 steps), LC-MS (program 1): R<sub>t</sub> = 2.70, ES MS+ (amu) calcd 17112, found 17107

**K33 linked Ub<sub>2</sub> synthesized via  $\gamma$ -thiolysine:** 1.1 mg (28%, 2 steps), LC-MS (program 1): R<sub>t</sub> = 2.65, MS+ (amu) calcd 17112, found 17107

### Stability of TMR-Ahx-Ub under free-radical desulfurization conditions

To investigate the stability of TAMRA-Ahx-Ub under free-radical desulfurization conditions, the fluorescent Ub mutant was incubated under different conditions using two radical initiators.

**conditions a:** V-50 (200 mM), T=60°C, TCEP (200 mM), GSH (40 mM), Gdn·HCl (6M), pH 6.5

**conditions b:** VA-044 (40 mM), T=37°C, TCEP (200 mM), GSH (40 mM), Gdn·HCl (6M), pH 6.5

It was found that TAMRA-Ahx-Ub was not stable when incubated at elevated temperature (T=60°C) using high concentration of radical initiator V-50 (conditions A). The reaction mixture changed color over time and mass analysis of the reaction mixture after 4.5h showed a mass that was indicative for loss of a methyl group (-15 Da) from the TAMRA label. In contrast, TAMRA-Ahx-Ub remained stable when it was incubated under mild temperature and low radical initiator concentration (conditions b) as was confirmed by ESMS analysis of the reaction mixture after 4.5h and 22h.

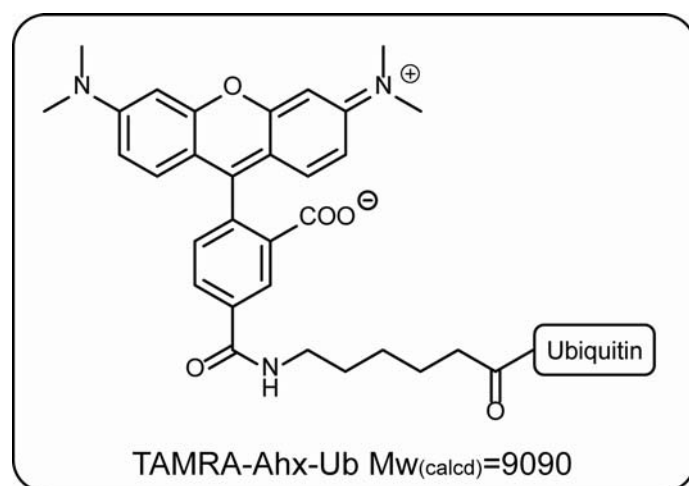

| M/z (observed) | M/z (calcd) | Compound                                       |
|----------------|-------------|------------------------------------------------|
| 9090           | 9090        | TAMRA-Ahx-Ub                                   |
| 9106           | 9106        | TAMRA-Ahx-Ub + O (oxidation)                   |
| 9075           | 9075        | TAMRA-Ahx-Ub – CH <sub>3</sub> (demethylation) |

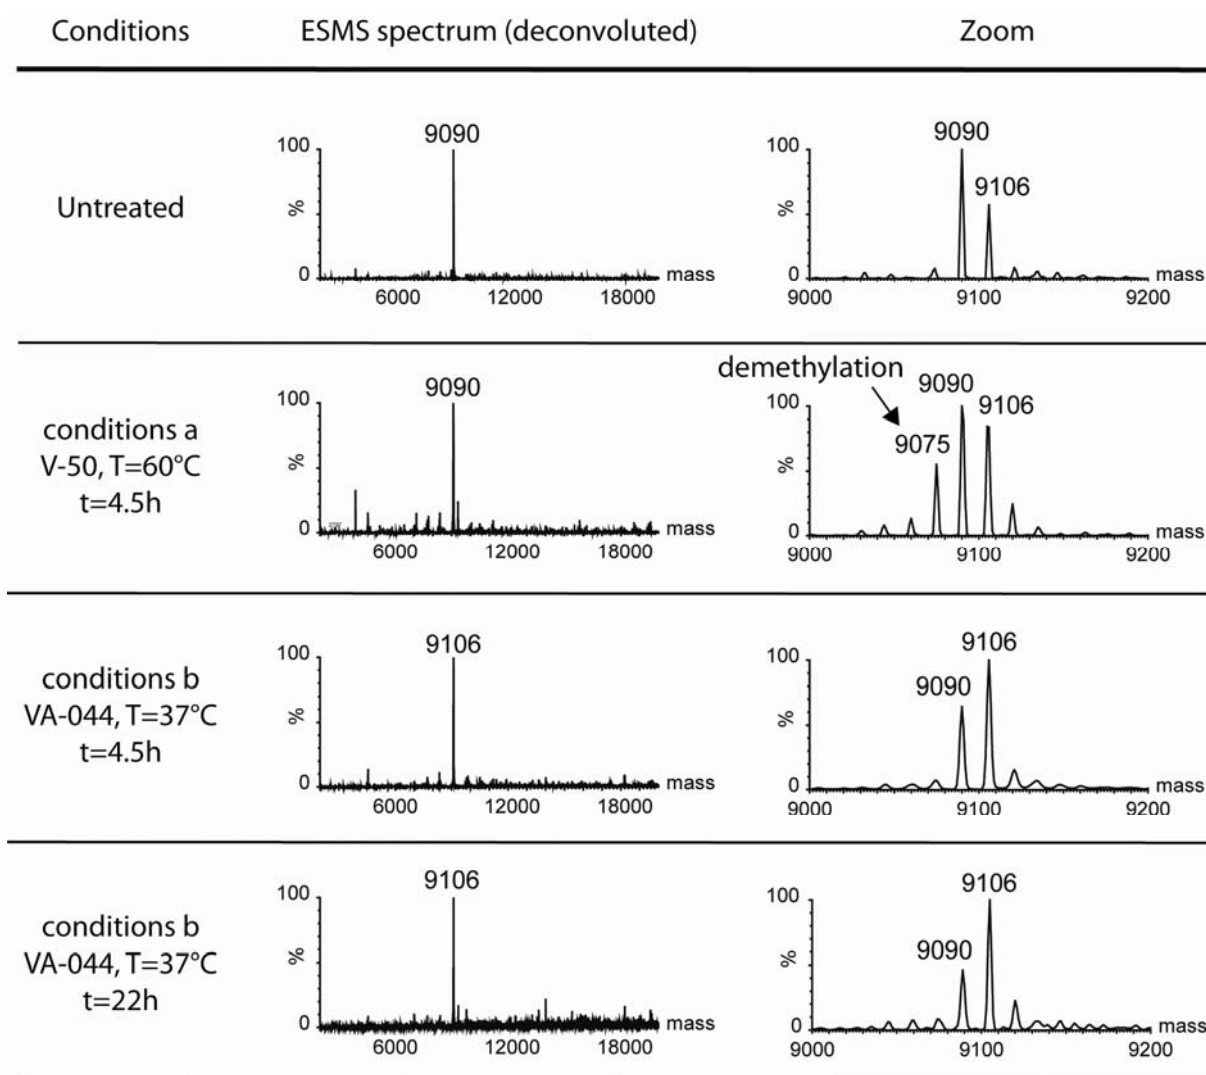

**Figure S8** ESMS analysis of TAMRA-Ahx-Ub stability under free-radical desulfurization conditions.

# Desulfurization of K6 $\delta$ - $\gamma$ -thiolysine linked Ub<sub>2</sub>

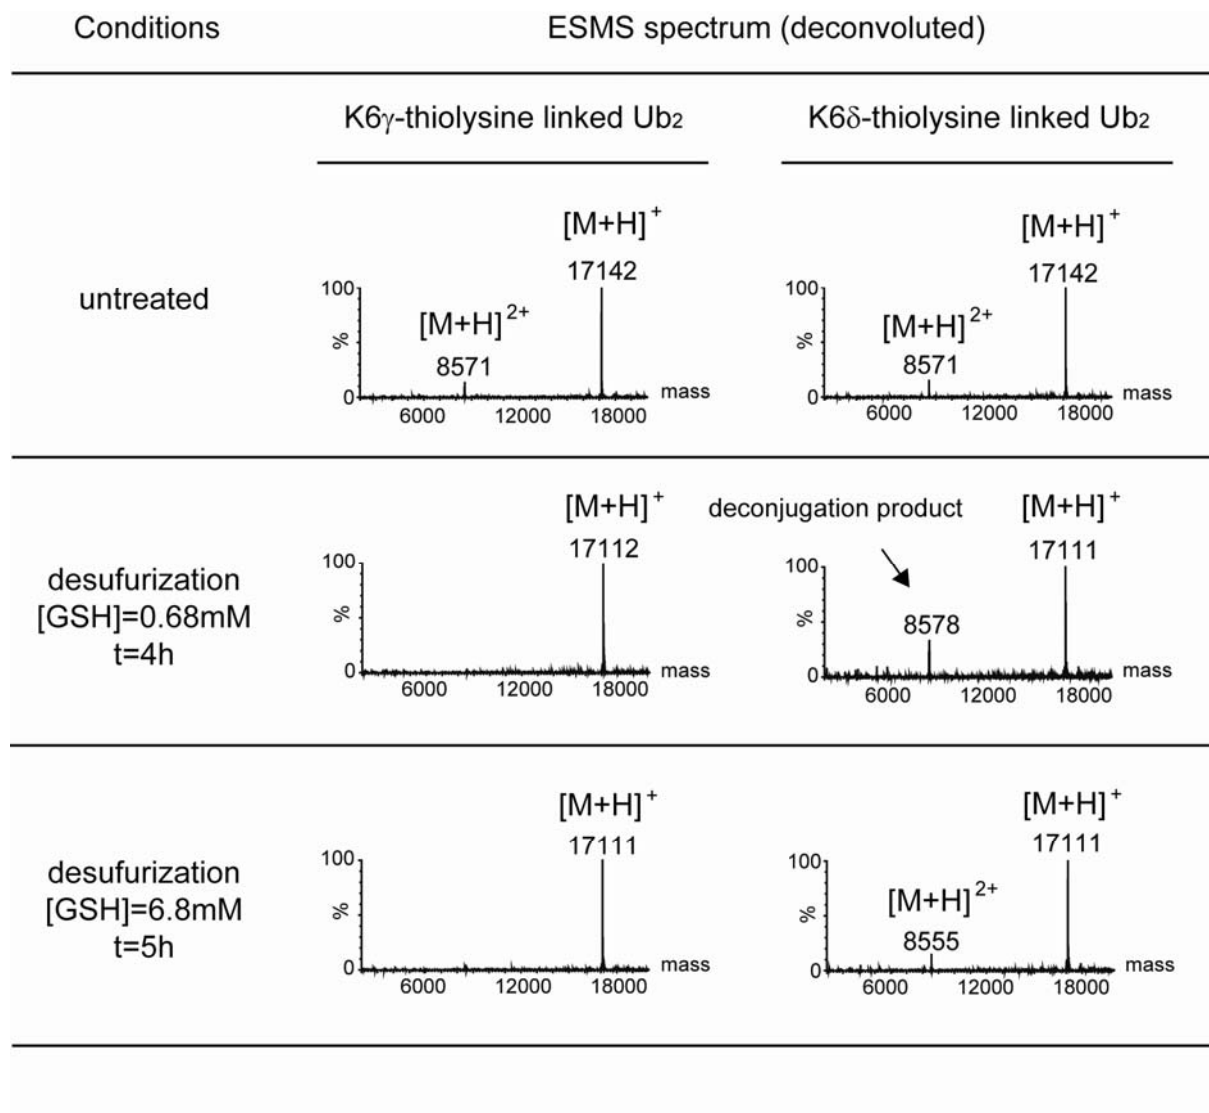

**Figure S9** ESMS analysis of the reaction mixture during free-radical desulfurization of K6 $\gamma$ -thiolysine and K6 $\delta$ -thiolysine linked diUb in the presence of different concentrations of GSH. Conditions: diUb (2 mg/mL), 0.2 M sodium phosphate (pH 6.5), 6M Gdn·HCl, GSH (0.68 or 6.8 mM), TCEP (200 mM), VA-044 (40 mM).

### Circular Dichroism (CD) Measurements

CD spectra were recorded at 298 K on a JASCO J-810 spectrometer equipped with a JASCO CDF-426S temperature control unit using 0.1 cm path length quartz cells. The CD spectra are an average of three scans, collected at 0.2 nm intervals between 185 and 260 nm. Ellipticity is reported as the mean residue ellipticity  $[\theta]$  in degrees  $\text{cm}^2 \text{dmol}^{-1}$ . Synthetic diUbs were compared to native Ub which was commercially obtained from Boston Biochem.

Sample preparation:

The purified diUb samples were dissolved in dmso and then diluted with 15 mL 20 mM  $\text{NaPO}_4$  (pH 6.8). Next, the dmso was removed by replacing the buffer for 20 mM  $\text{NaPO}_4$  (pH 6.8) over a 3.5 KDa Millipore spin filter. The samples were resuspended in 500  $\mu\text{L}$  20 mM  $\text{NaPO}_4$  (pH 6.8) buffer and the diUb concentrations were calculated using the BCA assay (K33 linked  $\text{Ub}_2$ : 50  $\mu\text{g/mL}$ , K48 linked  $\text{Ub}_2$ : 40  $\mu\text{g/mL}$ , mono Ub: 150  $\mu\text{g/mL}$ ).

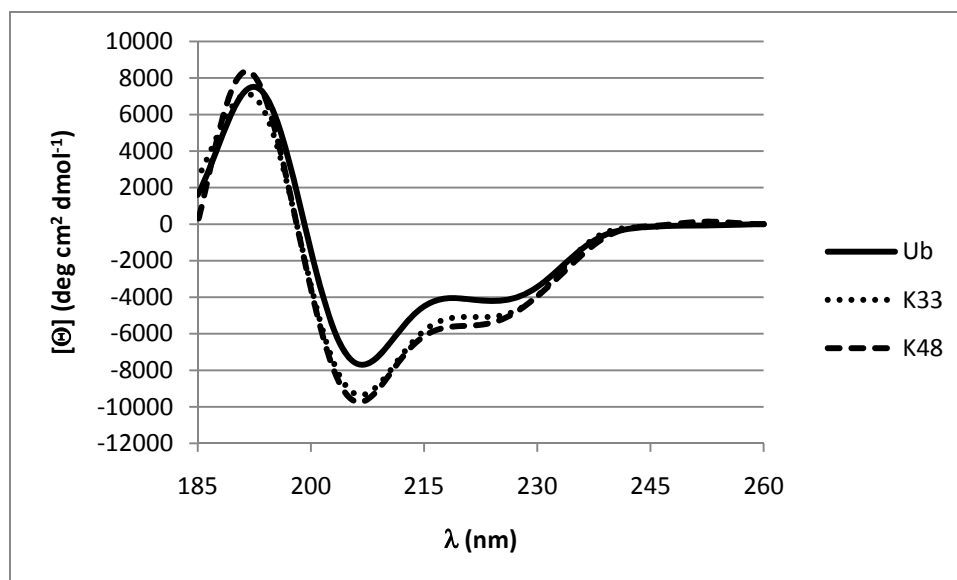

**Figure S10** CD spectra of synthetic K33 linked  $\text{Ub}_2$ , synthetic K48 linked  $\text{Ub}_2$  and native mono Ub.

### Enzymatic hydrolysis of synthetic diUbs by DUBs

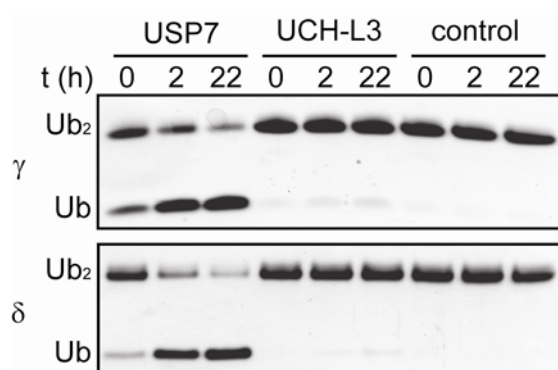

**Figure S11** Treatment of synthetic K33 linked di-Ub and K48 linked di-Ub with USP7 and UCH-L3. Conditions: 40 nM DUB, 15 μM diUb, 20 mM Tris (pH=7.5), 50 mM NaCl, 5 mM DTT.

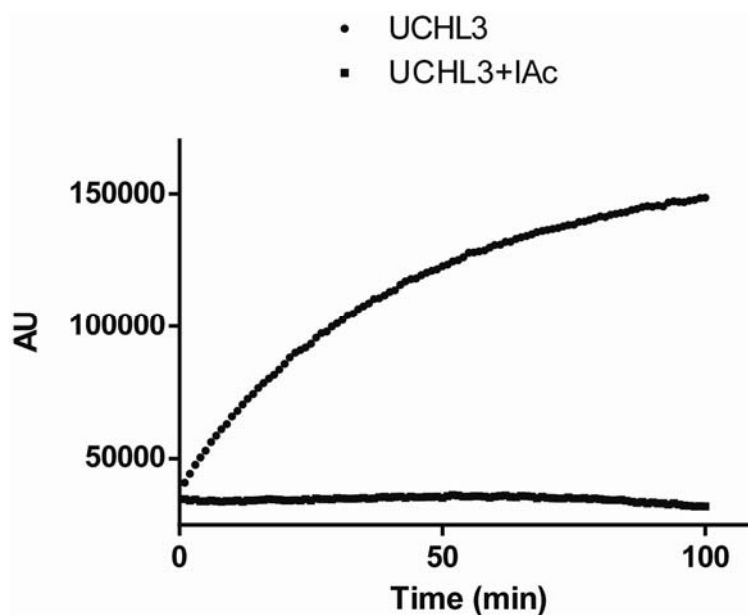

**Figure S12** UbAMC (400 nM) hydrolysis by UCH-L3 (5 pM), iodoacetamide (IAc) was added as negative controll.

## HPLC-MS chromatograms and ESMS spectra

### Ub(K48 $\delta$ -thiolysine)

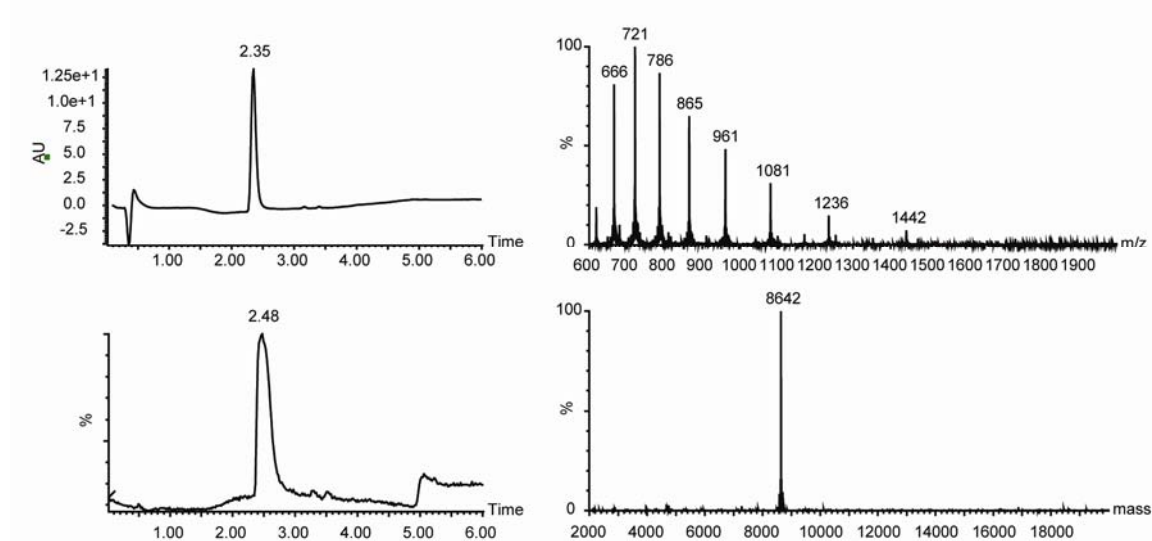

**Figure S13** HPLC-MS analysis Ub with Lys48 mutated to SSMe protected  $\delta$ -thiolysine. (top left) HPLC chromatogram, (bottom left) MS chromatogram, (top right) ESMS spectrum, (bottom right) deconvoluted mass of peak at 2.48 min from MS chromatogram.

### Ub(K48 $\gamma$ -thiolysine)

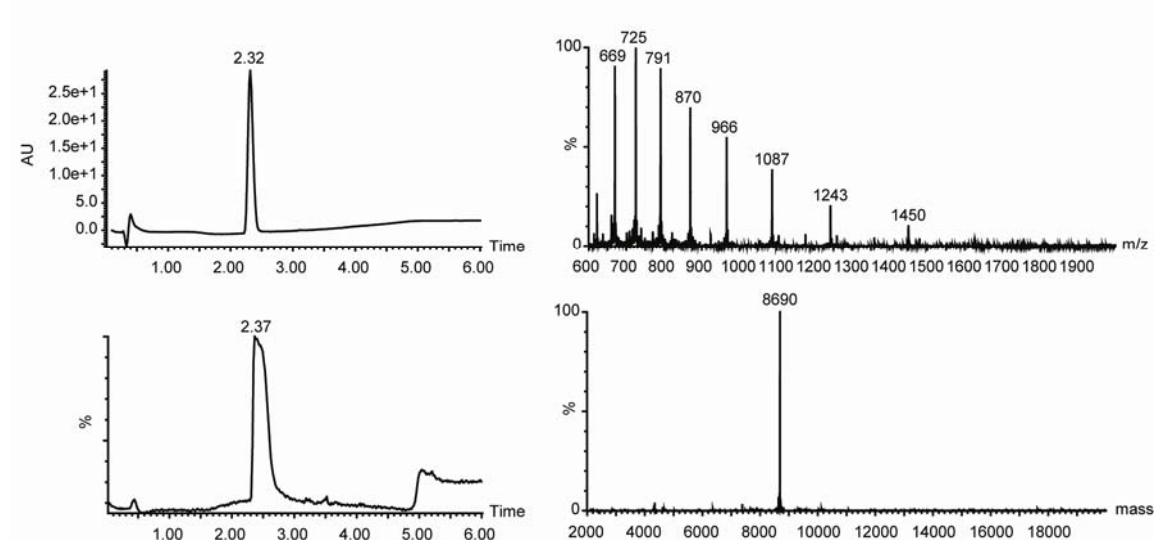

**Figure S14** HPLC-MS analysis Ub with Lys48 mutated to SStBu protected  $\gamma$ -thiolysine. (top left) HPLC chromatogram, (bottom left) MS chromatogram, (top right) ESMS spectrum, (bottom right) deconvoluted mass of peak at 2.37 min from MS chromatogram.

### K48 $\delta$ -thiolysine linked Ub<sub>2</sub>

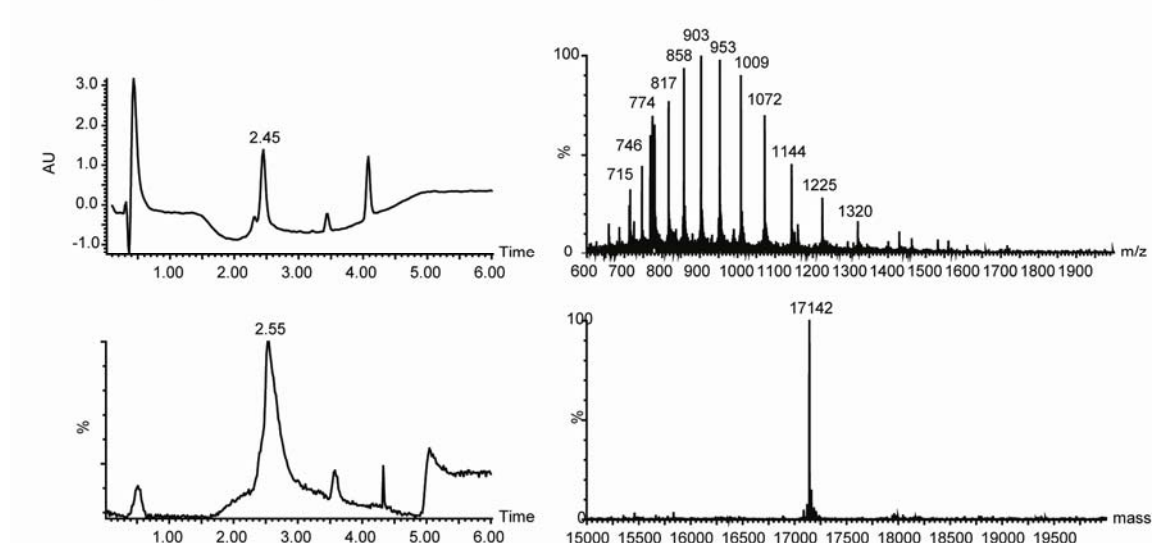

**Figure S15** HPLC-MS analysis Lys48 $\delta$ -thiolysine linked Ub<sub>2</sub>. (top left) HPLC chromatogram, (bottom left) MS chromatogram, (top right) ESMS spectrum, (bottom right) deconvoluted mass of peak at 2.55 min from MS chromatogram.

### K48 $\gamma$ -thiolysine linked Ub<sub>2</sub>

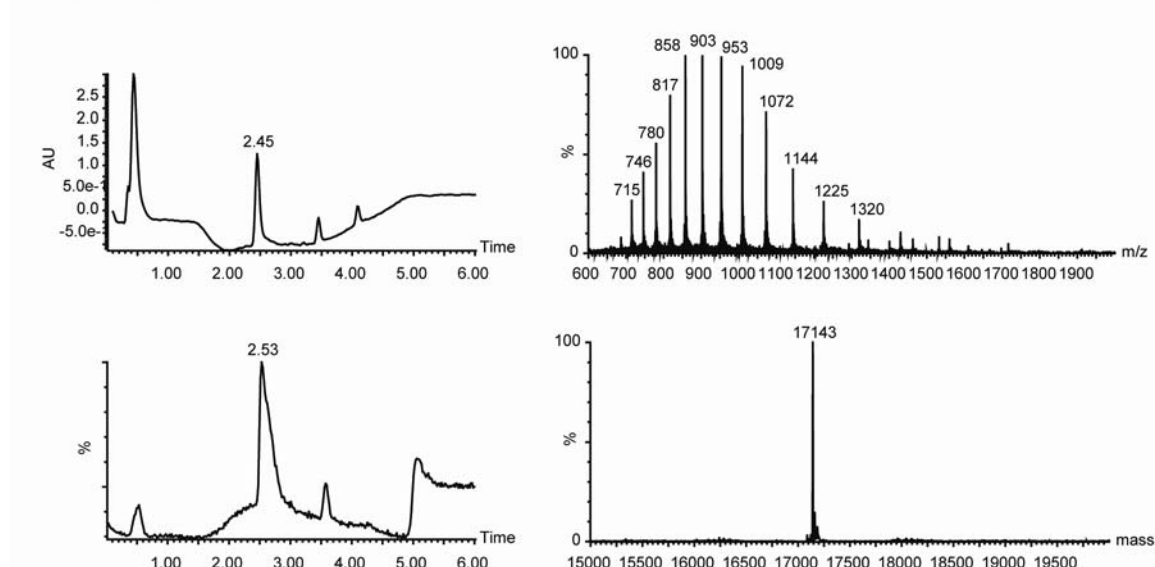

**Figure S16** HPLC-MS analysis Lys48 $\gamma$ -thiolysine linked Ub<sub>2</sub>. (top left) HPLC chromatogram, (bottom left) MS chromatogram, (top right) ESMS spectrum, (bottom right) deconvoluted mass of peak at 2.53 min from MS chromatogram.

### K48 linked Ub<sub>2</sub> synthesized via $\delta$ -thiolysine

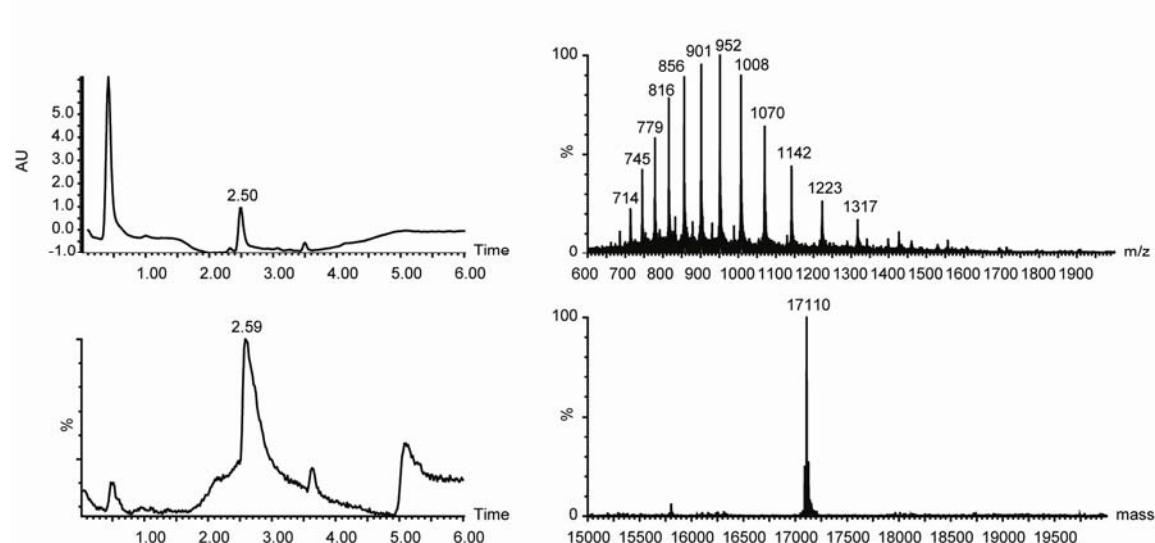

**Figure S17** HPLC-MS analysis Lys48 linked Ub<sub>2</sub> synthesized via  $\delta$ -thiolysine mediated ligation. (top left) HPLC chromatogram, (bottom left) MS chromatogram, (top right) ESMS spectrum, (bottom right) deconvoluted mass of peak at 2.59 min from MS chromatogram.

### K48 linked Ub<sub>2</sub> synthesized via $\gamma$ -thiolysine

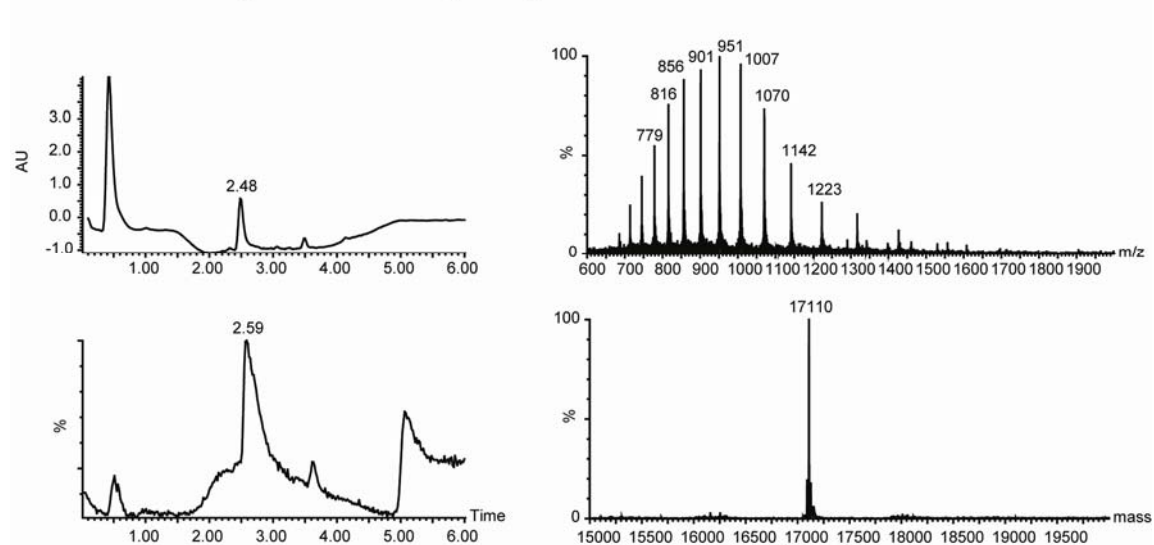

**Figure S18** HPLC-MS analysis Lys48 linked Ub<sub>2</sub> synthesized via  $\gamma$ -thiolysine mediated ligation. (top left) HPLC chromatogram, (bottom left) MS chromatogram, (top right) ESMS spectrum, (bottom right) deconvoluted mass of peak at 2.59 min from MS chromatogram.

### Ub(K33 $\delta$ -thiolysine)

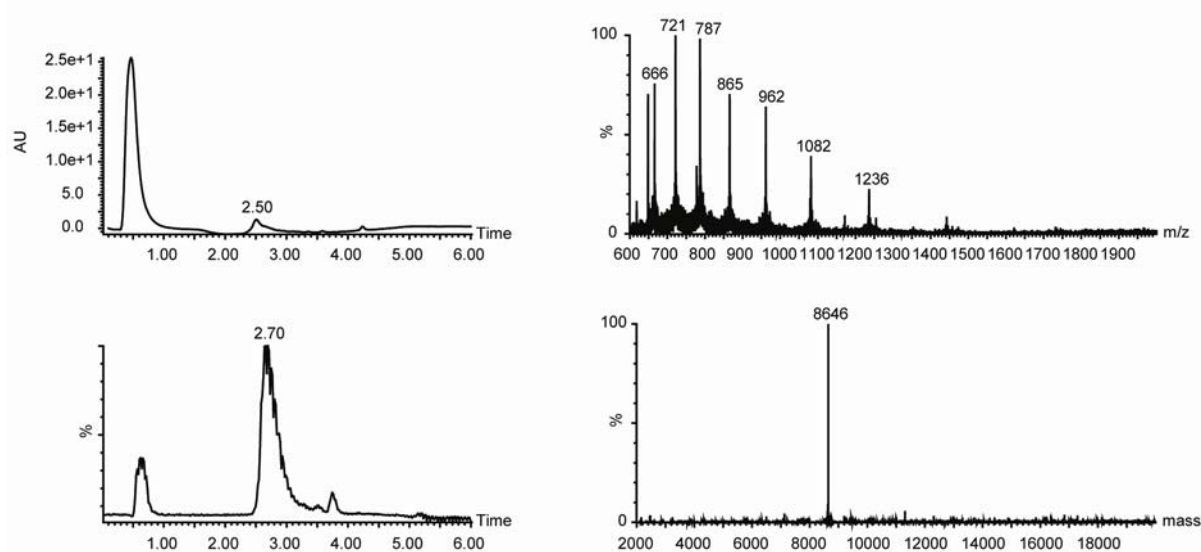

**Figure S19** HPLC-MS analysis Ub with Lys33 mutated to SSMe protected  $\delta$ -thiolysine. (top left) HPLC chromatogram, (bottom left) MS chromatogram, (top right) ESMS spectrum, (bottom right) deconvoluted mass of peak at 2.70 min from the MS chromatogram.

### Ub(K33 $\gamma$ -thiolysine)

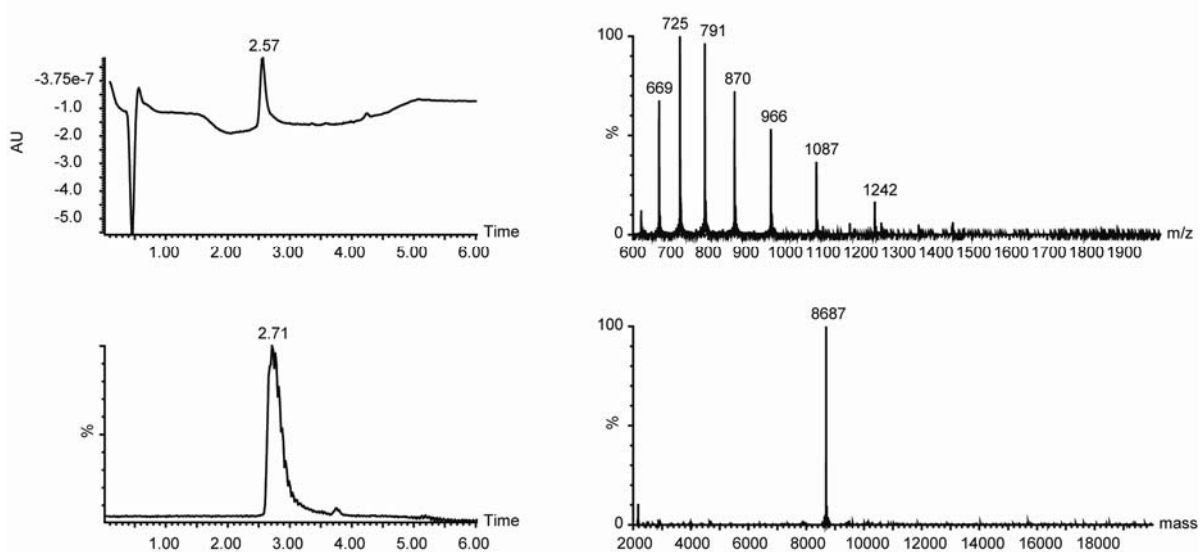

**Figure S20** HPLC-MS analysis Ub with Lys33 mutated to SStBu protected  $\gamma$ -thiolysine. (top left) HPLC chromatogram, (bottom left) MS chromatogram, (top right) ESMS spectrum, (bottom right) deconvoluted mass of peak at 2.71 min from the MS chromatogram.

### K33 $\delta$ -thiolysine linked Ub<sub>2</sub>

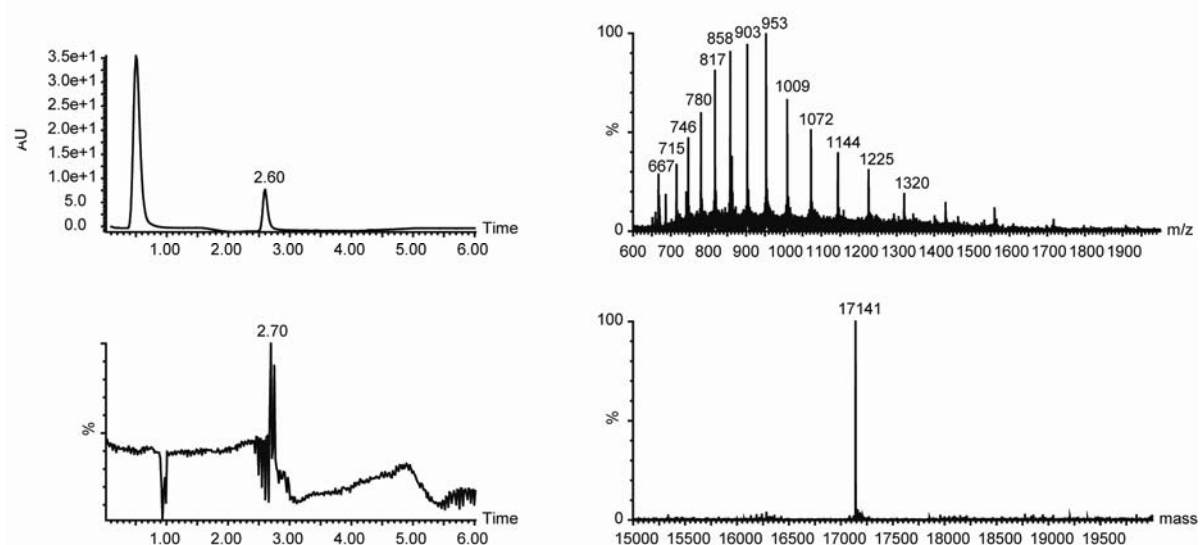

**Figure S21** HPLC-MS analysis Lys33 $\delta$ -thiolysine linked Ub<sub>2</sub>. (top left) HPLC chromatogram, (bottom left) MS chromatogram, (top right) ESMS spectrum, (bottom right) deconvoluted mass of peak at 2.70 min from the MS chromatogram.

### K33 $\gamma$ -thiolysine linked Ub<sub>2</sub>

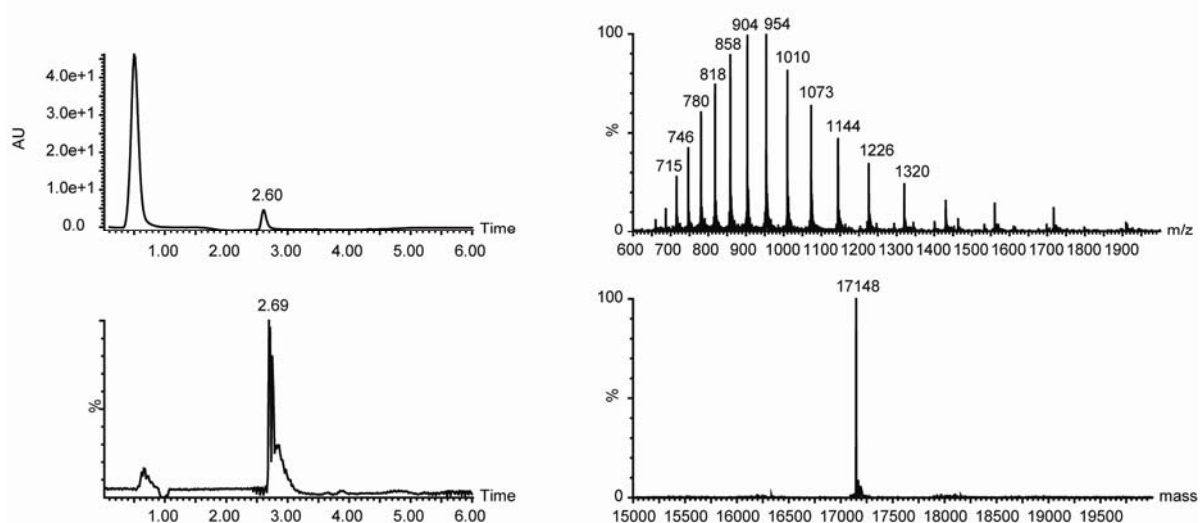

**Figure S22** HPLC-MS analysis Lys33 $\gamma$ -thiolysine linked Ub<sub>2</sub>. (top left) HPLC chromatogram, (bottom left) MS chromatogram, (top right) ESMS spectrum, (bottom right) deconvoluted mass of peak at 2.69 min from the MS chromatogram.

### K33 linked Ub<sub>2</sub> synthesized via $\delta$ -thiolysine

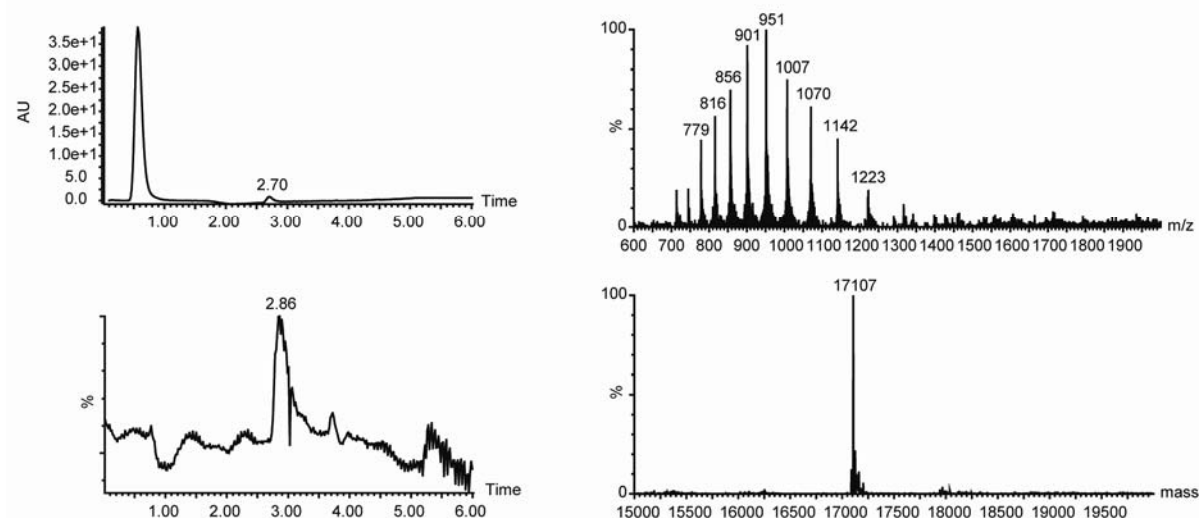

**Figure S23** HPLC-MS analysis Lys48 linked Ub<sub>2</sub> synthesized via  $\delta$ -thiolysine mediated ligation. (top left) HPLC chromatogram, (bottom left) MS chromatogram, (top right) ESMS spectrum, (bottom right) deconvoluted mass of peak at 2.86 min from MS chromatogram.

### K33 linked Ub<sub>2</sub> synthesized via $\gamma$ -thiolysine

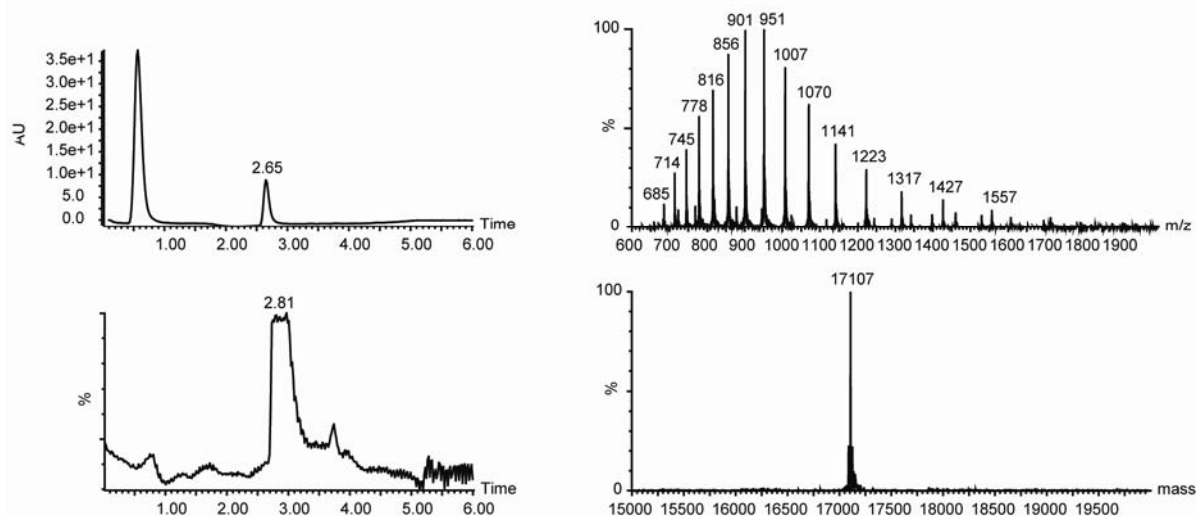

**Figure S24** HPLC-MS analysis Lys48 linked Ub<sub>2</sub> synthesized via  $\gamma$ -thiolysine mediated ligation. (top left) HPLC chromatogram, (bottom left) MS chromatogram, (top right) ESMS spectrum, (bottom right) deconvoluted mass of peak at 2.81 min from MS chromatogram.

### K6 $\delta$ -thiolysine linked Ub<sub>2</sub>

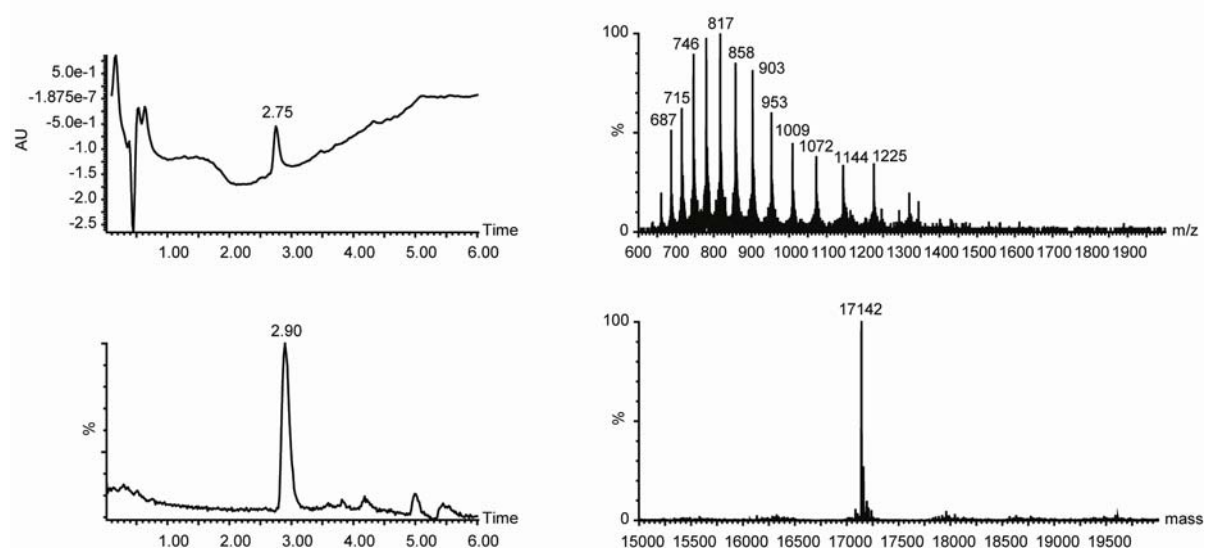

**Figure S25** HPLC-MS analysis Lys6 $\delta$ -thiolysine linked Ub<sub>2</sub>. (top left) HPLC chromatogram, (bottom left) MS chromatogram, (top right) ESMS spectrum, (bottom right) deconvoluted mass of peak at 2.90 min from the MS chromatogram.

### K6 $\gamma$ -thiolysine linked Ub<sub>2</sub>

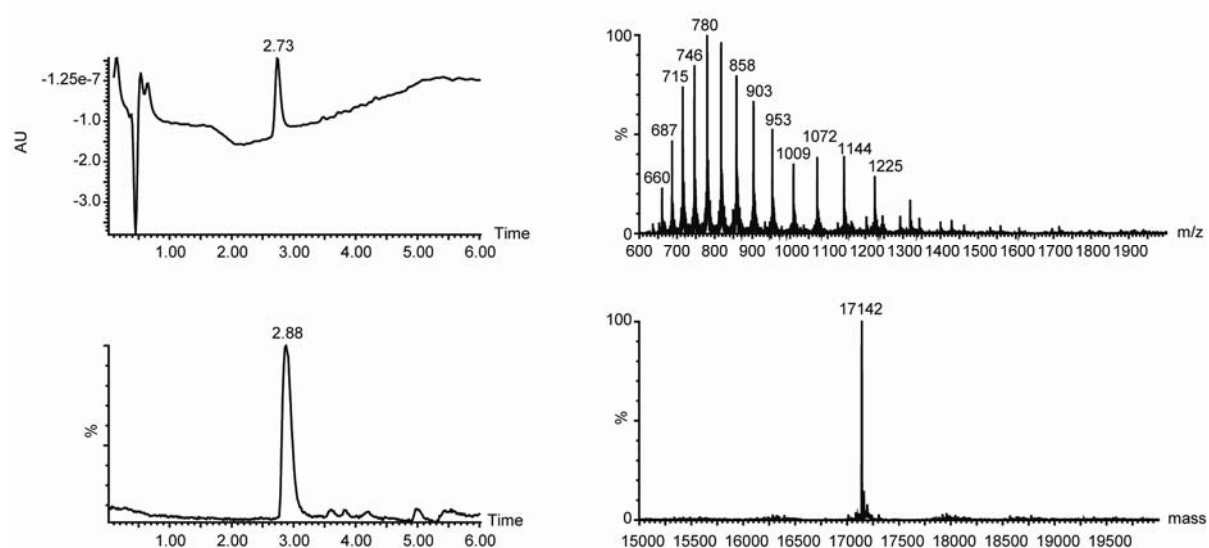

**Figure S26** HPLC-MS analysis Lys6 $\gamma$ -thiolysine linked Ub<sub>2</sub>. (top left) HPLC chromatogram, (bottom left) MS chromatogram, (top right) ESMS spectrum, (bottom right) deconvoluted mass of peak at 2.88 min from the MS chromatogram.

# NMR spectra

<sup>1</sup>H-NMR

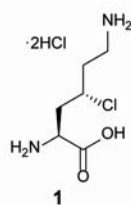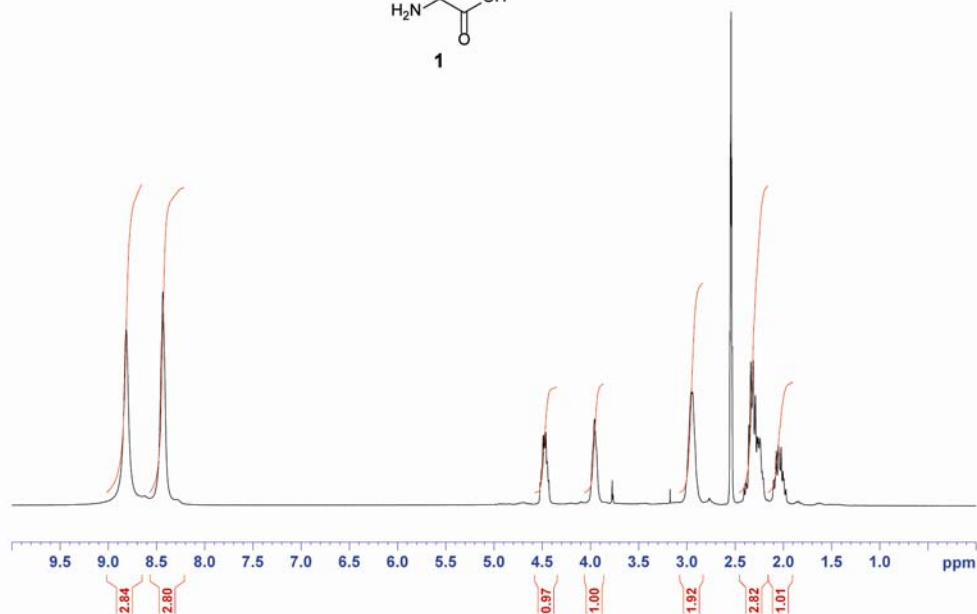

<sup>13</sup>C-NMR

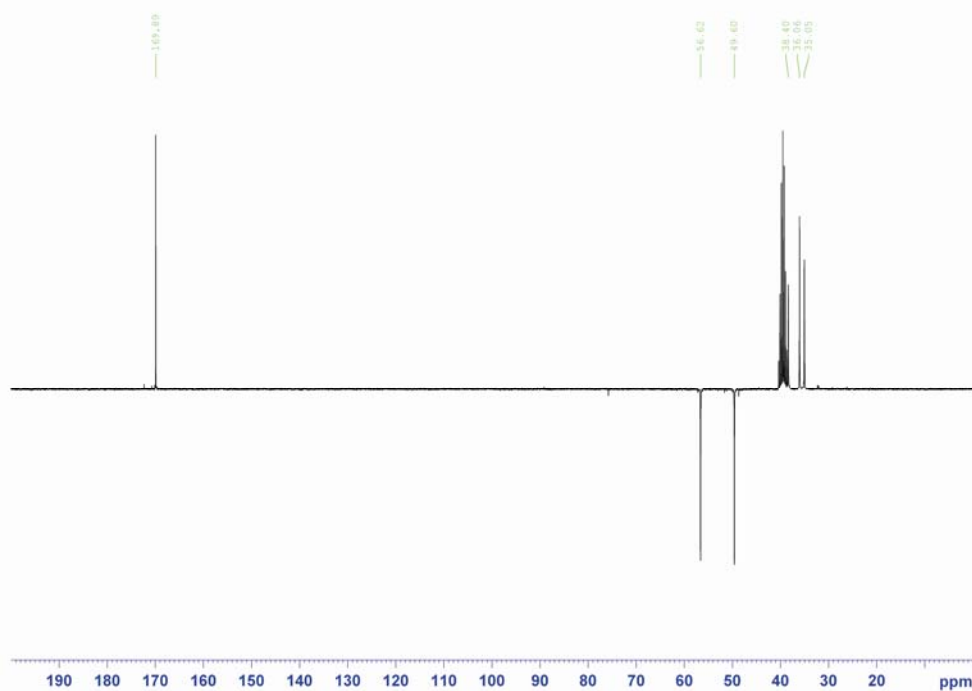

<sup>1</sup>H-NMR

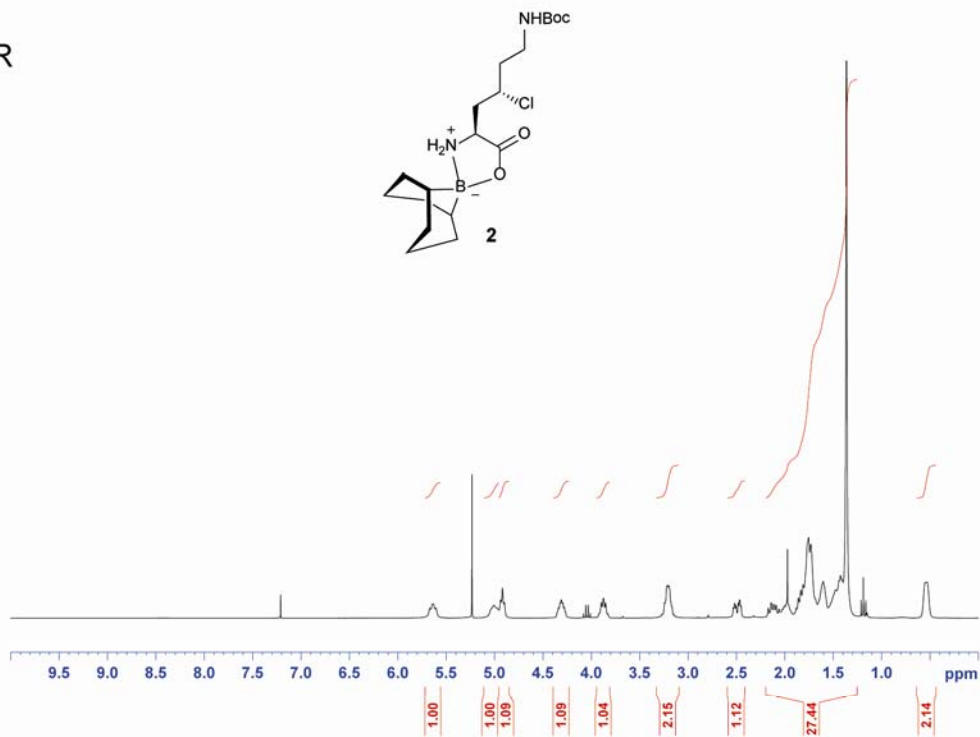

<sup>13</sup>C-NMR

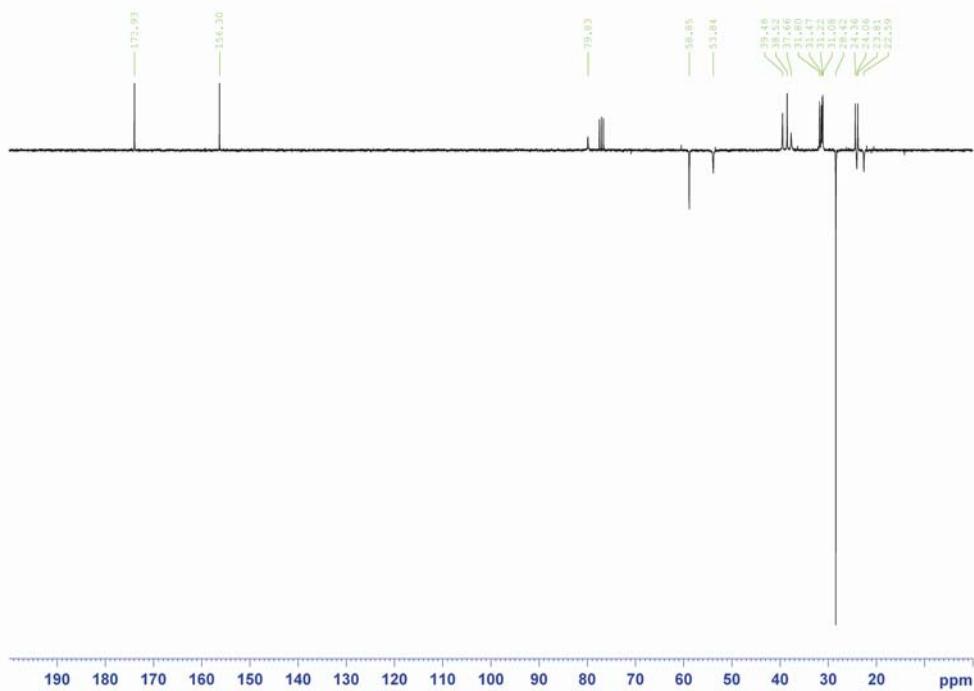

# <sup>1</sup>H-NMR

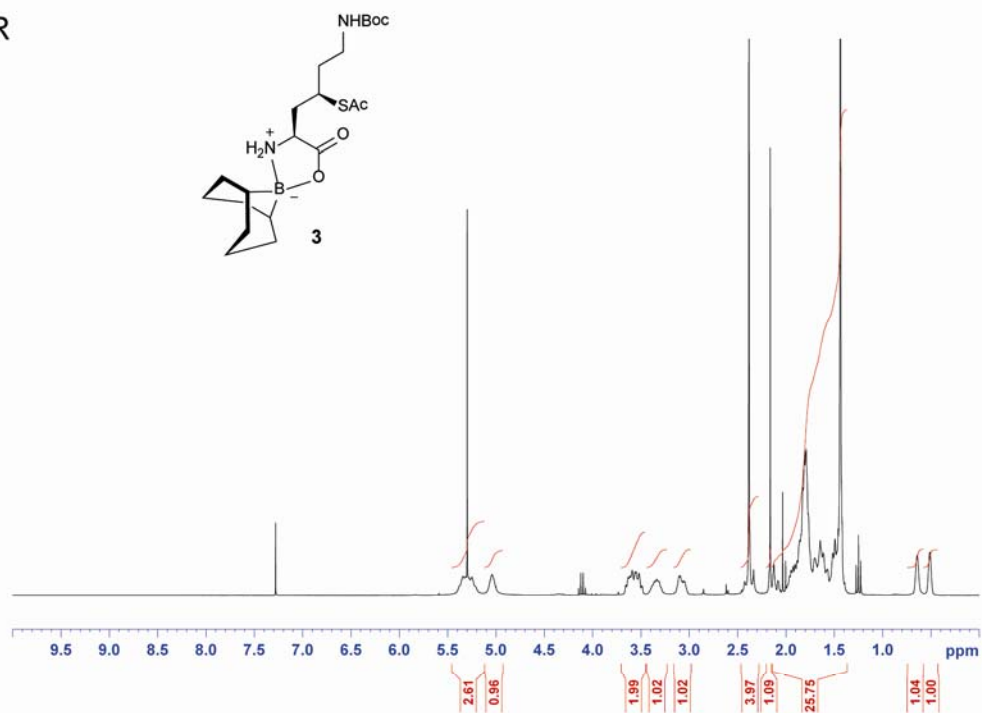

# <sup>13</sup>C-NMR

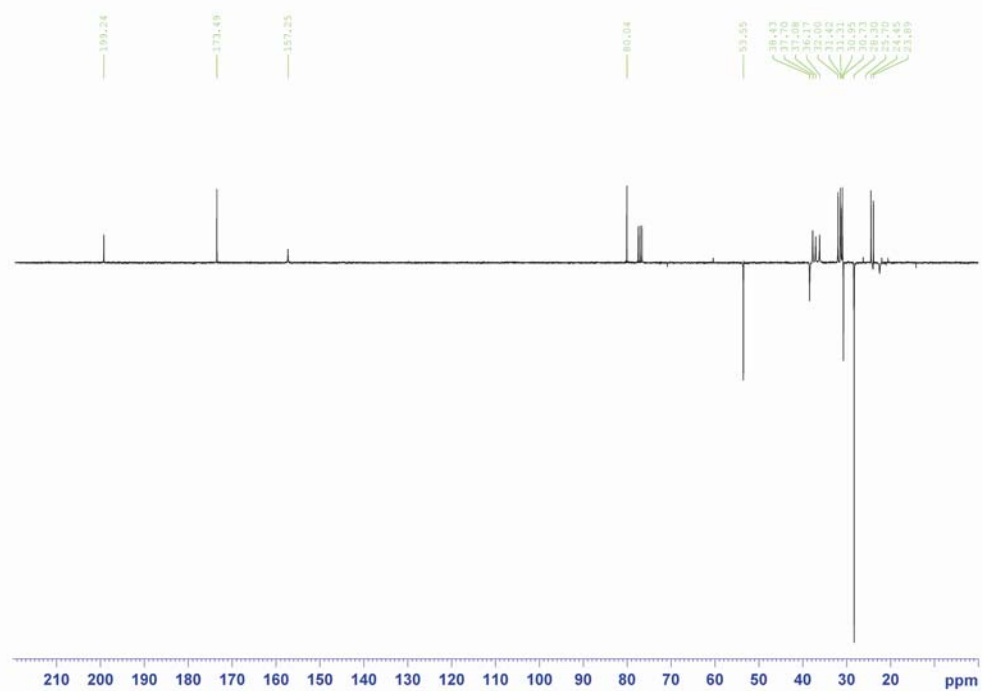

# <sup>1</sup>H-NMR

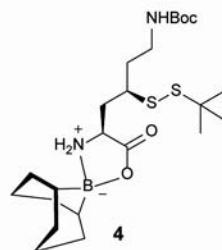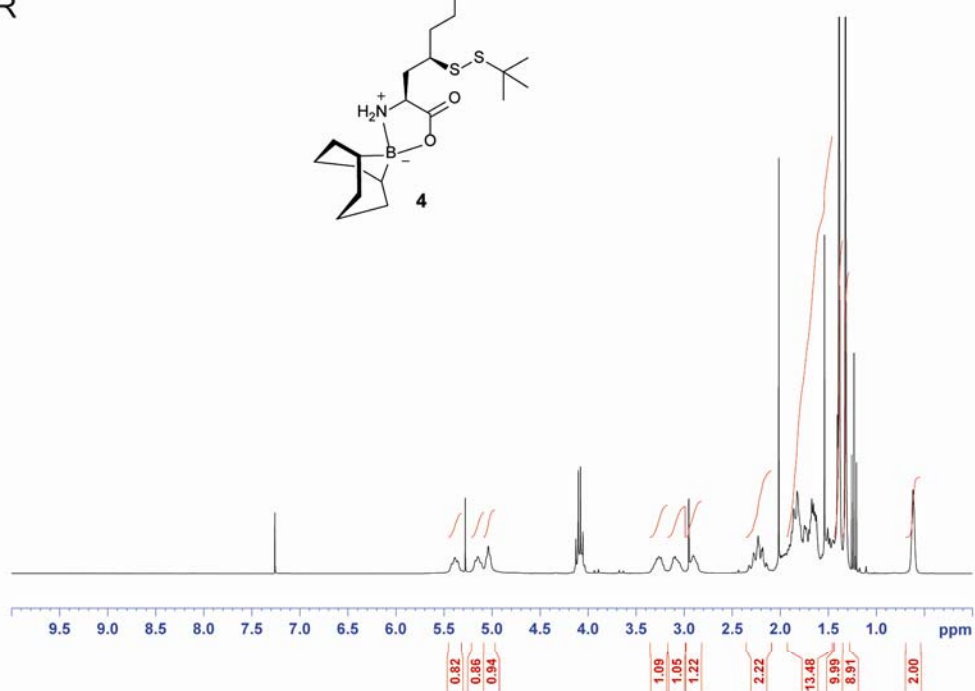

# <sup>13</sup>C-NMR

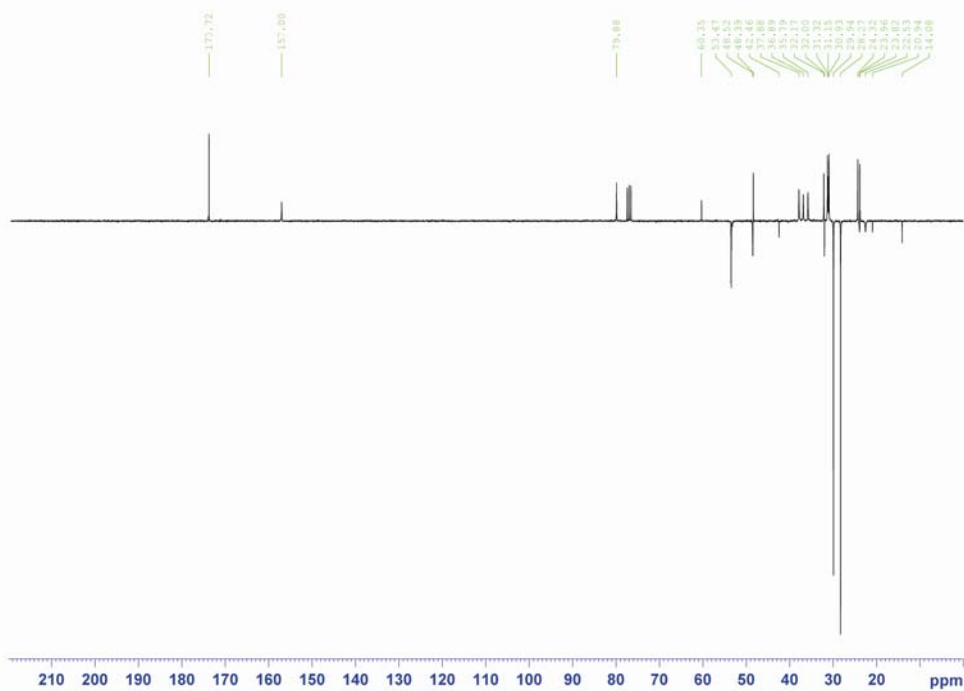

# <sup>1</sup>H-NMR

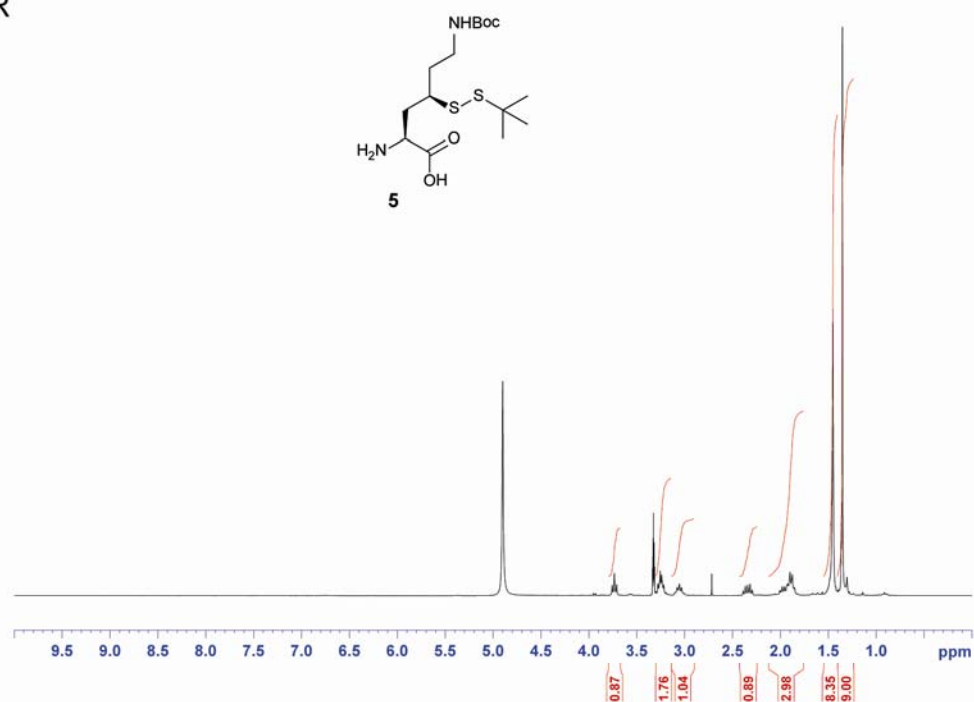

# <sup>13</sup>C-NMR

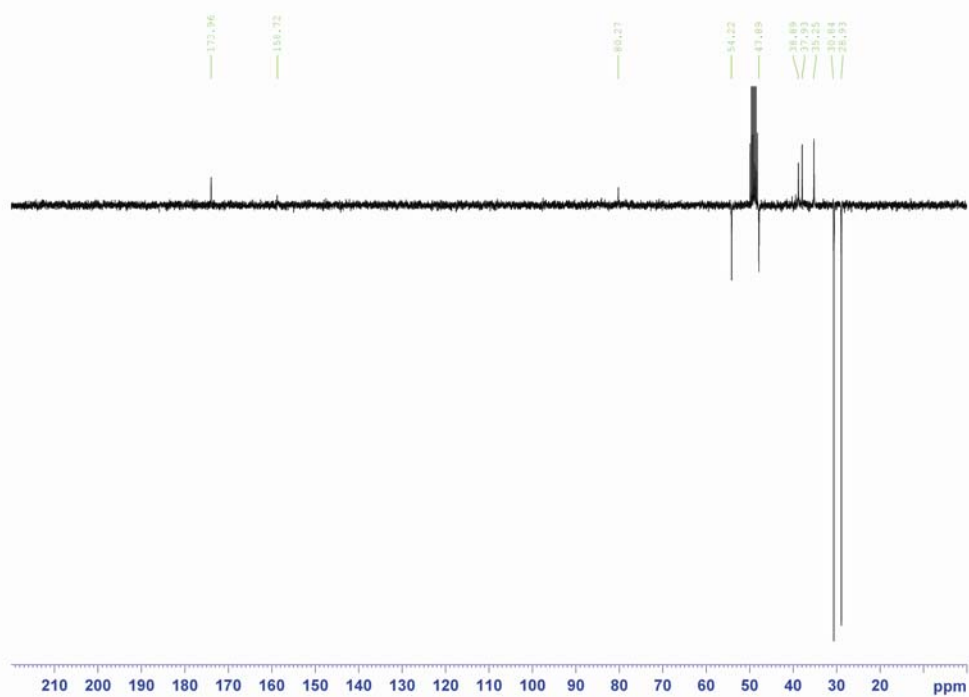

# <sup>1</sup>H-NMR

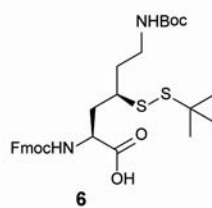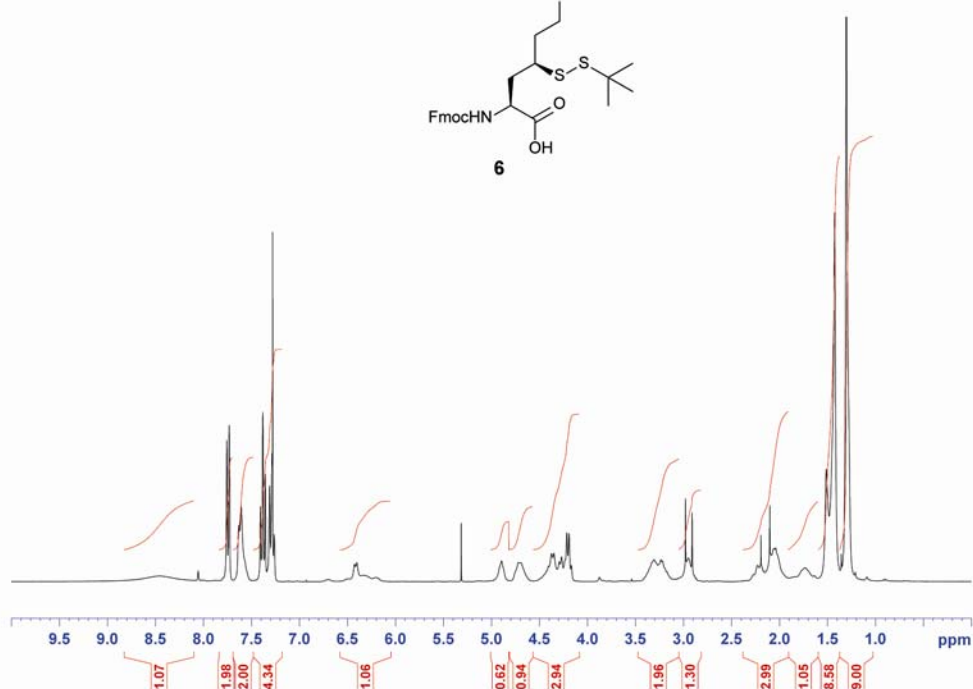

# <sup>13</sup>C-NMR

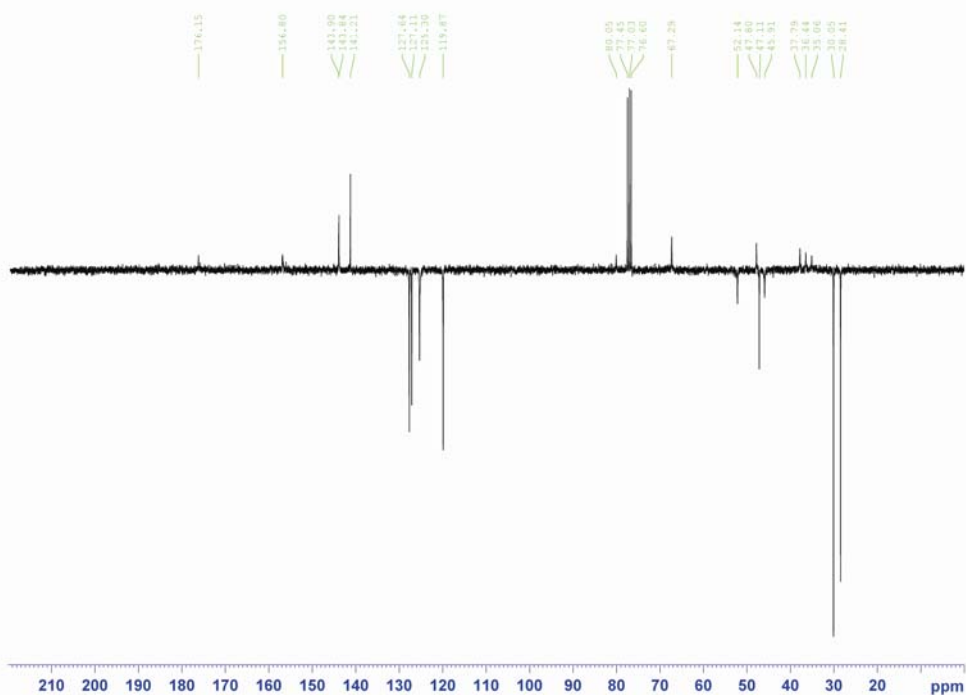

<sup>1</sup>H-NMR

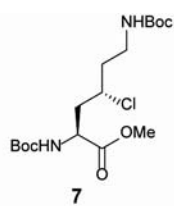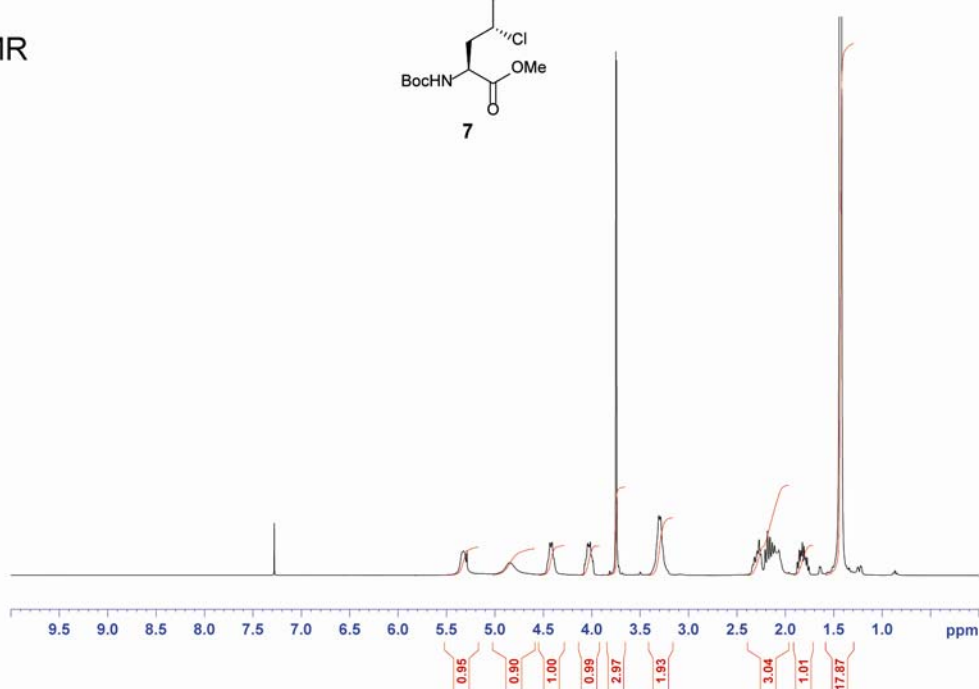

<sup>13</sup>C-NMR

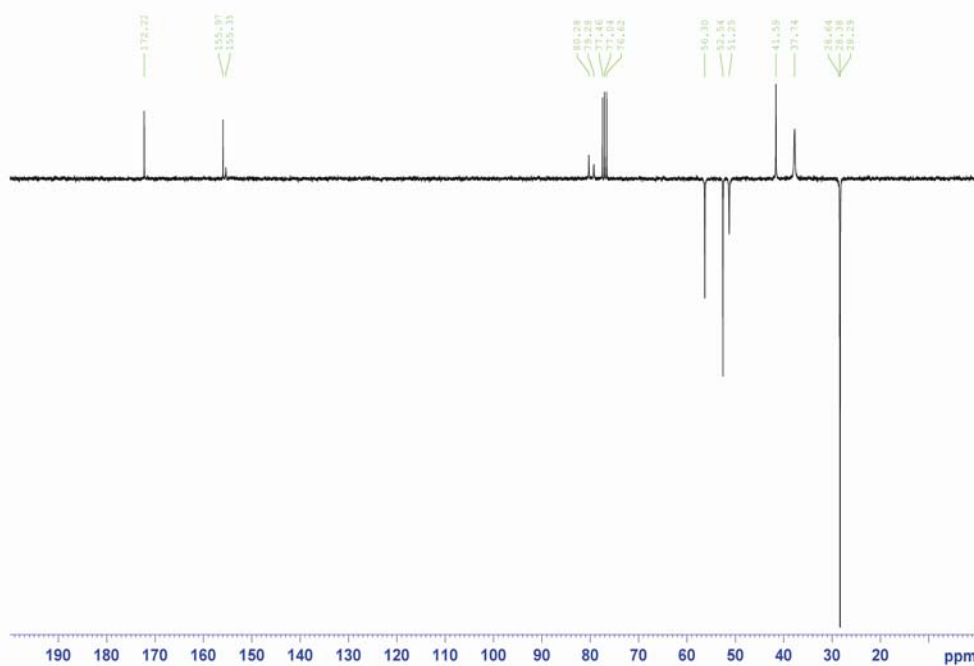

## References

1. J. Kollonitsch, A. Rosegay and G. Doldouras, *Journal of the American Chemical Society*, 1964, **86**, 1857-1858.
2. Bruker (2001). SAINT-Plus. Bruker AXS Inc., Madison, Wisconsin, USA.
3. Sheldrick, G. M. (1999). SADABS: Area-Detector Absorption Correction, Universität Göttingen, Germany.
4. Sheldrick, G. M. (2012). SHELXT, Universität Göttingen, Germany.
5. G. M. Sheldrick, *Acta crystallographica. Section A, Foundations of crystallography*, 2008, **64**, 112-122.
6. H. Flack, *Acta Crystallographica Section A*, 1983, **39**, 876-881.
7. A. L. Spek, *Acta crystallographica. Section D, Biological crystallography*, 2009, **65**, 148-155.
8. F. El Oualid, R. Merks, R. Ekkebus, D. S. Hameed, J. J. Smit, A. de Jong, H. Hilkmann, T. K. Sixma and H. Ova, *Angewandte Chemie*, 2010, **49**, 10149-10153.
